# Supplementary material for: Pd-functionalized polydopamine-coated polyurethane foam: a readily prepared and highly reusable structured catalyst for selective alkyne semi-hydrogenation and Suzuki coupling under air
Source: Royal Society of Chemistry journal article supplement (doi:10.1039/d2gc03283j), 2022-11-29
Supplement: d2gc03283j1.pdf [file d2gc03283j1.pdf]

# **Pd-functionalized polydopamine-coated polyurethane foam: a readily prepared and highly reusable structured catalyst for selective alkyne semi-hydrogenation and Suzuki coupling under air**

Han Peng,<sup>a</sup> Xiong Zhang,<sup>b</sup> Vasiliki Papaefthimiou,<sup>b</sup> Cuong Pham-Huu<sup>\*b</sup> and Vincent Ritleng<sup>\*a</sup>

<sup>a</sup> Université de Strasbourg, Ecole européenne de Chimie, Polymères et Matériaux, CNRS, LIMA, UMR 7042, 25 rue Becquerel, 67087 Strasbourg, France. [vrirleng@unistra.fr](mailto:vrirleng@unistra.fr)

<sup>b</sup> Institute of Chemistry and Processes for Energy, Environment and Health (ICPEES), ECPM, UMR 7515 CNRS-University of Strasbourg, 25 rue Becquerel, 67087 Strasbourg Cedex 02, France. [cuong.pham-huu@unistra.fr](mailto:cuong.pham-huu@unistra.fr)

## **Contents**

|                                                                                                                                                                                   |        |
|-----------------------------------------------------------------------------------------------------------------------------------------------------------------------------------|--------|
| <b>Figure S1.</b> SEM-EDX spectrum and elemental mapping of as-synthesized Pd@PDA@PUF                                                                                             | S3     |
| <b>Figure S2.</b> XPS survey spectra of Pd@PDA@PUF: (A) as-synthesized, (B) spent                                                                                                 | S3     |
| <b>Figure S3.</b> XRD profiles of as-synthesized and spent Pd@PDA@PUF                                                                                                             | S4     |
| <b>Figure S4.</b> TGA curves of PUF, PDA@PUF, as-synthesized Pd@PDA@PUF and spent Pd@PDA@PUF                                                                                      | S4     |
| <b>Figure S5.</b> Standard setup for all semi-hydrogenation experiments                                                                                                           | S5     |
| <b>Optimization studies for the semi-hydrogenation of phenylacetylene (PA) to styrene (ST) with Pd@PDA@PUF in EtOH at RT</b>                                                      | S6     |
| <b>Figure S6.</b> Kinetic monitoring of the optimization tests of PA semi-hydrogenation with Pd@PDA@PUF                                                                           | S7     |
| <b>Table S1.</b> Results of optimization tests of PA semi-hydrogenation to ST                                                                                                     | S7     |
| <b>Figure S7.</b> Photo of the reaction medium after the hydrogenation of phenylacetylene with [Pd(NH <sub>3</sub> ) <sub>4</sub> Cl <sub>2</sub> ]·H <sub>2</sub> O (0.23 mol%). | S8     |
| <b>Figure S8.</b> Stop-and-go experiment on 4-octyne' semi-hydrogenation with Pd@PDA@PUF                                                                                          | S9     |
| <b>Figure S9.</b> HR-SEM images with different magnifications of spent Pd@PDA@PUF                                                                                                 | S10    |
| <b>Figure S10.</b> SEM-EDX spectrum and elemental maps of spent Pd@PDA@PUF                                                                                                        | S11    |
| <b>Figure S11.</b> <sup>1</sup> H NMR spectra of the reaction mixture of the semi-hydrogenation of 1,2-diphenylethyne after 1, 2, 3, 4, 5 and 6 h reaction                        | S12-14 |
| <b>Figure S12.</b> <sup>1</sup> H NMR spectrum of 1,2-diphenylethyne                                                                                                              | S15    |

|                                                                                                                                               |        |
|-----------------------------------------------------------------------------------------------------------------------------------------------|--------|
| <b>Figure S13.</b> $^1\text{H}$ NMR spectrum of ( <i>Z</i> )-1,2-diphenylethene                                                               | S15    |
| <b>Figure S14.</b> $^1\text{H}$ NMR spectrum of ( <i>E</i> )-1,2-diphenylethene                                                               | S16    |
| <b>Figure S15.</b> $^1\text{H}$ NMR spectrum of the reaction mixture of the semi-hydrogenation of ethyl 3-phenylpropiolate after 4 h reaction | S17    |
| <b>Figure S16.</b> $^1\text{H}$ -NMR spectrum of ethyl 3-phenylpropiolate                                                                     | S18    |
| <b>Figure S17.</b> $^1\text{H}$ NMR spectrum of ethyl cinnamate                                                                               | S18    |
| <b>Figure S18.</b> $^1\text{H}$ NMR spectrum of ethyl 3-phenylpropanoate                                                                      | S19    |
| <b>Figures S19-S38.</b> $^1\text{H}$ and $^{13}\text{C}\{^1\text{H}\}$ NMR spectra of the Suzuki cross-coupling products                      | S20-29 |
| <b>References</b>                                                                                                                             | S30    |

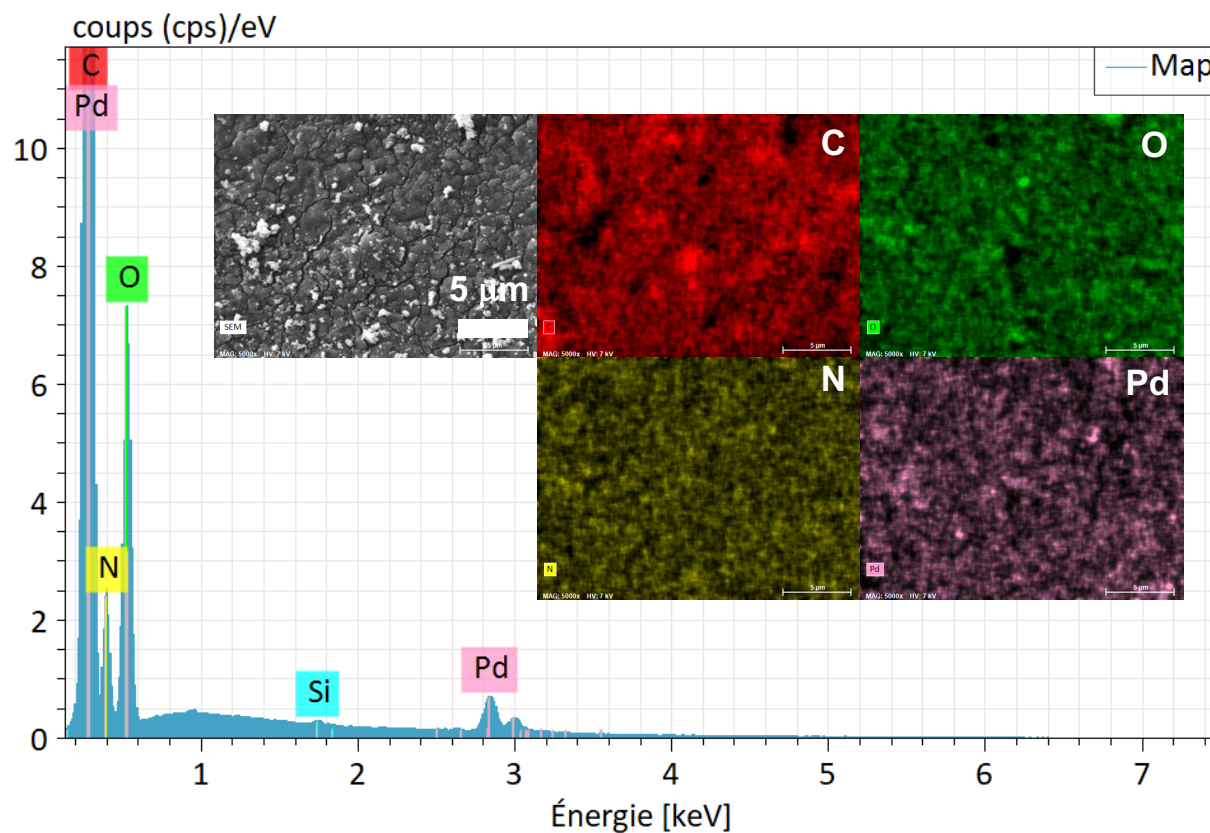

**Figure S1.** SEM-EDX spectrum and elemental mapping of as-synthesized Pd@PDA@PUF.

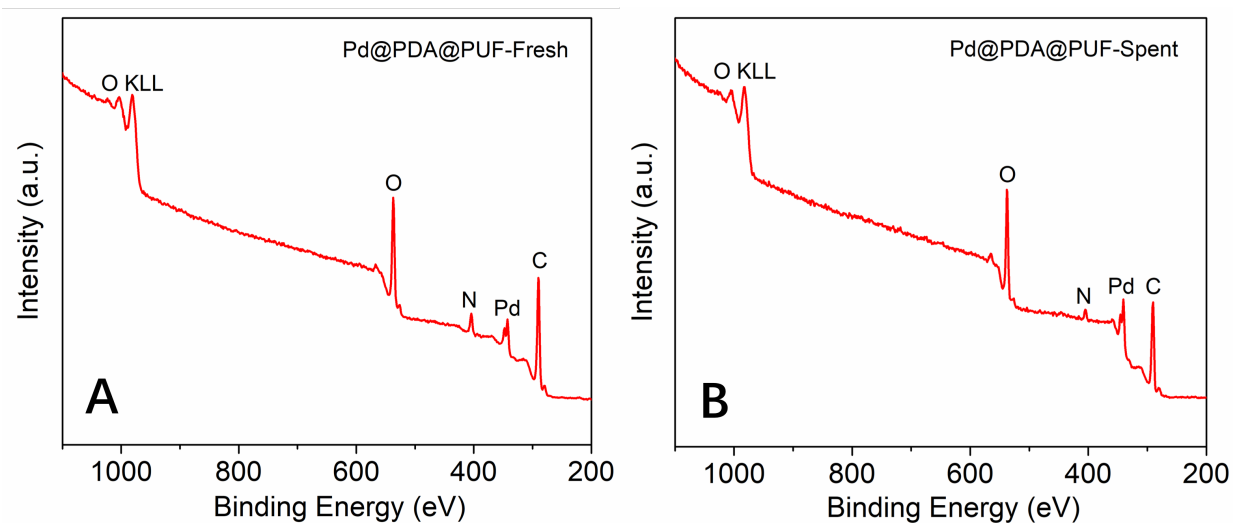

**Figure S2.** XPS survey spectra of Pd@PDA@PUF: (A) as-synthesized, (B) spent (after 15 cycling tests).

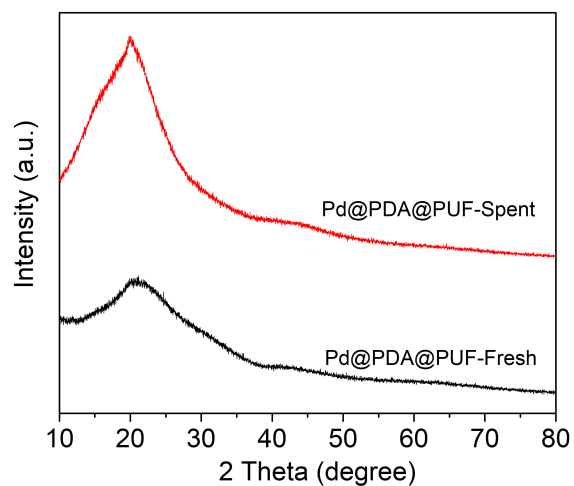

**Figure S3.** XRD profiles of Pd@PDA@PUF: black curve, as-synthesized; red curve, spent (after 15 cycling tests).

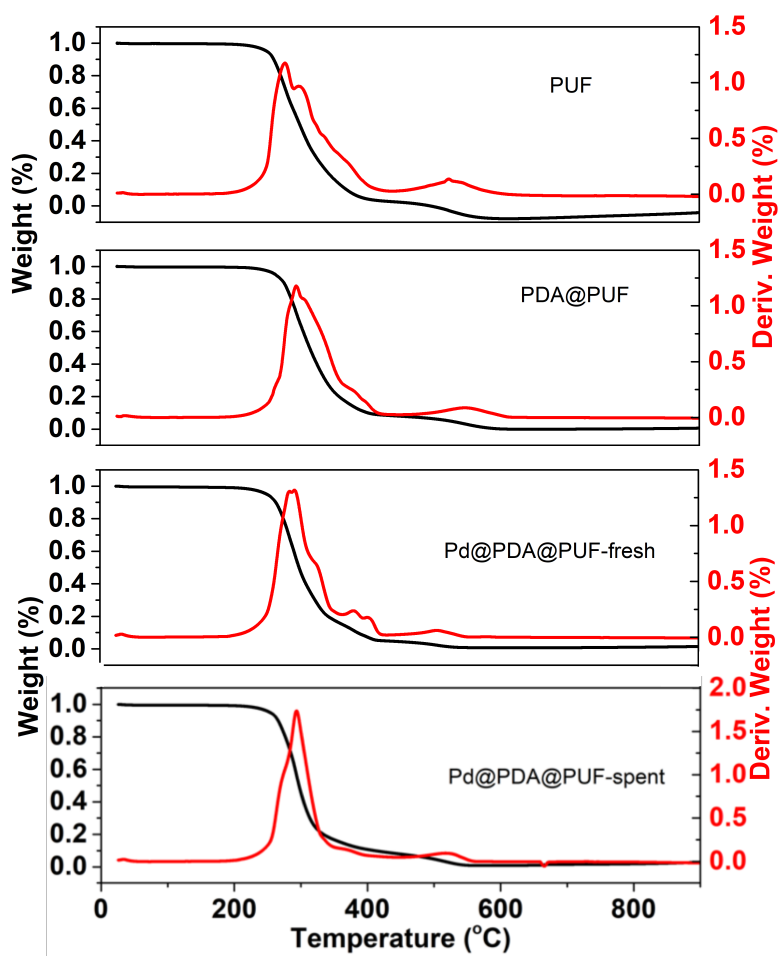

**Figure S4.** TGA curves of PUF, PDA@PUF, as-synthesized Pd@PDA@PUF and spent Pd@PDA@PUF (after 15 cycling tests).



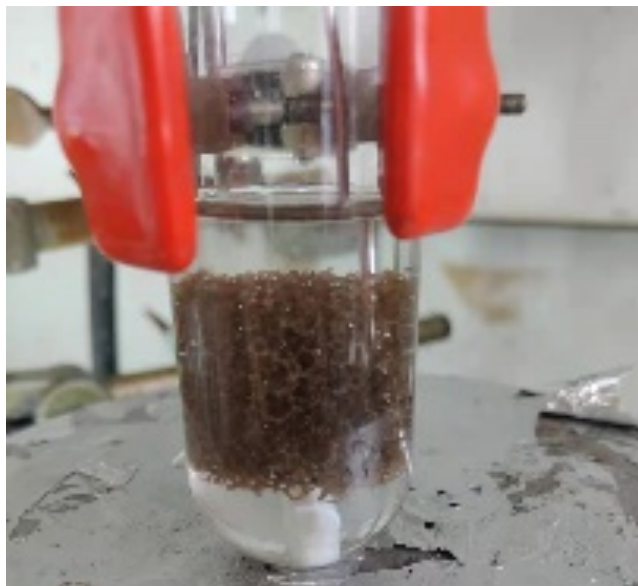

**Figure S5.** Standard setup for all semi-hydrogenation experiments.

### **Optimization studies for the semi-hydrogenation of phenylacetylene (PA) to styrene (ST) with Pd@PDA@PUF in EtOH at RT**

All successive experiments were carried out with the same Pd@PDA@PUF foam of *ca.* 8 cm<sup>3</sup> whose mass was adjusted in function of its Pd content to have a Pd loading of 7  $\mu$ mol. The two first trials, run with a Pd loading of 0.46 mol% and a H<sub>2</sub> flow of 13 mL/min, displayed similar reaction kinetics, with 98% conversion of PA and 97% selectivity to ST after 3.3 h for the 1<sup>st</sup> run (TON = 213, TOF = 65 h<sup>-1</sup>), and 93% conversion and 90% ST selectivity after 3 h in the 2<sup>nd</sup> run (TON = 202, TOF = 67 h<sup>-1</sup>) (Table S1, entries A and B). Once all alkyne had been consumed, the selectivity began to drop down as over-hydrogenation occurred (Fig. S6A and S6B). In view of these encouraging results, notably the little acceleration of the reaction kinetics between the two runs, we performed a third run under the same conditions. As can be seen in Figure S6C, we again observed a very selective conversion of PA to ST without any appreciable competition of further hydrogenation of the latter to give ethylbenzene (EB) until all PA had been consumed. Thus, 97% conversion was reached in 3 h with a ST selectivity of 88% (TON = 211, TOF = 70 h<sup>-1</sup>) (Table S1, entry C). In the 4<sup>th</sup> run, the rate of H<sub>2</sub> flow was decreased from 13 to 2 mL/min in order to map out its influence on the catalytic performance. No positive effect was observed on the hydrogenation selectivity, as only 94% ST selectivity at 81% PA conversion was observed after 2 h reaction and as it dropped similarly once all PA was consumed (Figure S6D and Table S1, entry D). We thus maintained the H<sub>2</sub> flow rate to 13 mL/min for the next two experiments, but increased the reactant's concentration to 3 and 6 mmol, conversely decreasing the catalyst loading from 0.46 mol% to 0.23 mol% in the 5<sup>th</sup> run (Figure S6E) and to 0.11 mol% in the 6<sup>th</sup> run (Figure S6F). Remarkably, the Pd@PDA@PUF catalyst maintained a very high chemoselectivity with higher kinetics in the 5<sup>th</sup> run, achieving as high as 91% conversion with 95% selectivity to ST after 2 h (TON = 396; TOF = 197 h<sup>-1</sup>) (Table S1, entry E). Again, ST hydrogenation to EB occurred appreciably only after full consumption of PA. When the substrate loading was doubled again to 6 mmol, the selectivity and the turnover frequency gratifyingly maintained to the same level, with 98% PA conversion with 94% selectivity after 4.25 h, thus giving a TON of 891 and a TOF of 210 h<sup>-1</sup> (Table S1, entry F). The latter conditions were chosen as the standard conditions.

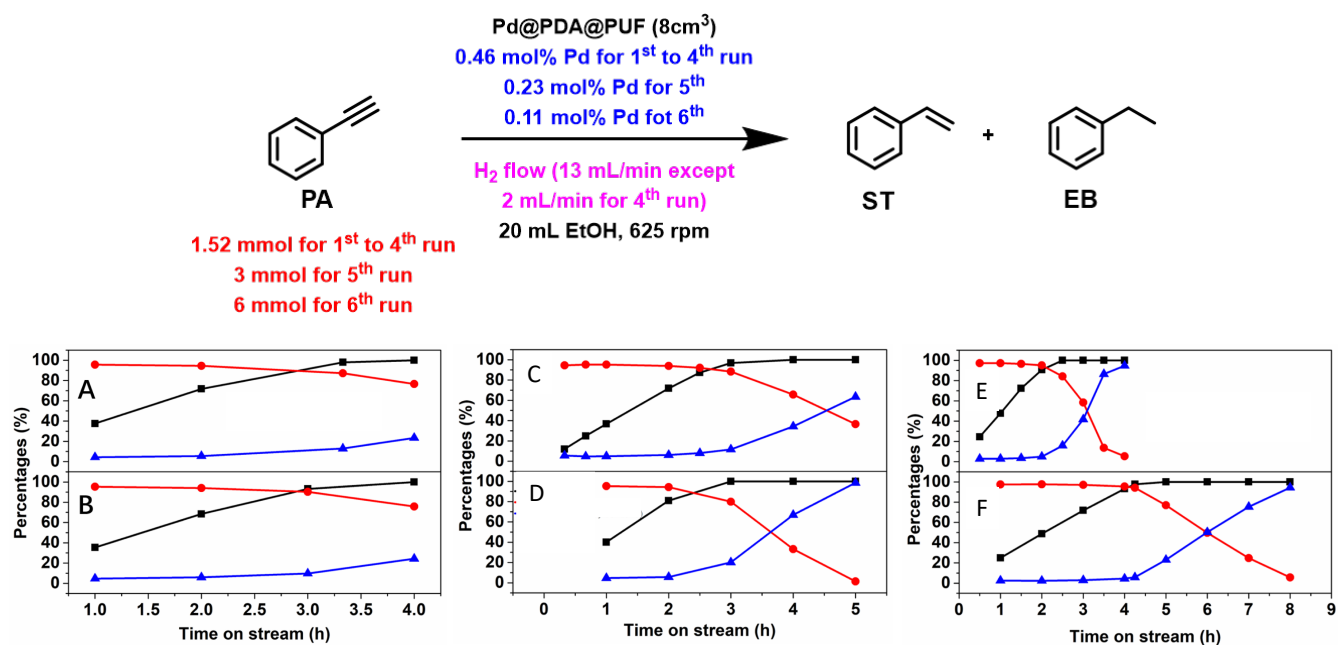

**Figure S6.** Kinetic monitoring of the optimization tests of PA semi-hydrogenation with Pd@PDA@PUF (*ca.* 8 cm<sup>3</sup>, Pd content 7.00.10<sup>-3</sup> mmol) in EtOH (20 mL) at RT under 625 rpm. **A, B, C:** PA (1.52 mmol), H<sub>2</sub> (13 mL/min); **D:** PA (1.52 mmol), H<sub>2</sub> (2 mL/min); **E:** PA (3 mmol), H<sub>2</sub> (13 mL/min); **F:** PA (6 mmol), H<sub>2</sub> (13 mL/min). Black curves: PA conversion. Red curves: selectivity to ST. Blue curves: selectivity to ethylbenzene (EB).

**Table S1.** Results of optimization tests of PA semi-hydrogenation to ST.

| Entry | Cat. loading<br>(Pd mol%) | H <sub>2</sub> flow<br>speed | Time (h) | Conv.<br>(%) <sup>a</sup> | Select.<br>(%) <sup>a</sup> | TON <sup>b</sup> | TOF (h <sup>-1</sup> ) |
|-------|---------------------------|------------------------------|----------|---------------------------|-----------------------------|------------------|------------------------|
| A     | 0.46                      | 13                           | 3.3      | 98                        | 97                          | 207              | 63                     |
| B     | 0.46                      | 13                           | 3        | 93                        | 90                          | 182              | 61                     |
| C     | 0.46                      | 13                           | 3        | 97                        | 88                          | 186              | 62                     |
| D     | 0.46                      | 2                            | 2        | 81                        | 94                          | 166              | 83                     |
| E     | 0.23                      | 13                           | 2        | 91                        | 95                          | 376              | 188                    |
| F     | 0.12                      | 13                           | 4.25     | 98                        | 95                          | 776              | 183                    |

<sup>a</sup> PA conversion and ST selectivity were determined by GC analysis. <sup>b</sup> Turnover number expressed as mol of PA converted to ST vs. the catalytic loading.

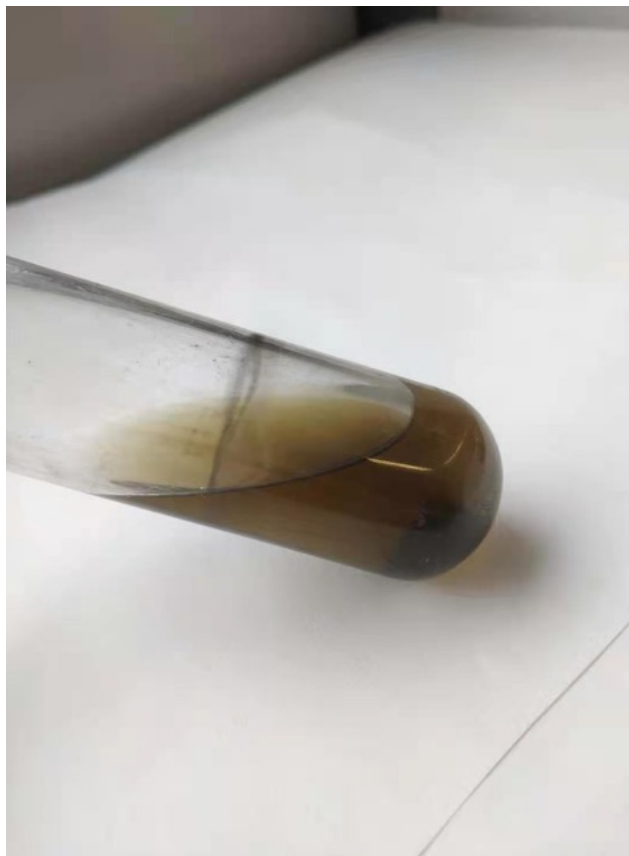

**Figure S7.** Photo of the reaction medium after the hydrogenation of phenylacetylene with  $[\text{Pd}(\text{NH}_3)_4\text{Cl}_2]\cdot\text{H}_2\text{O}$  (0.23 mol%).

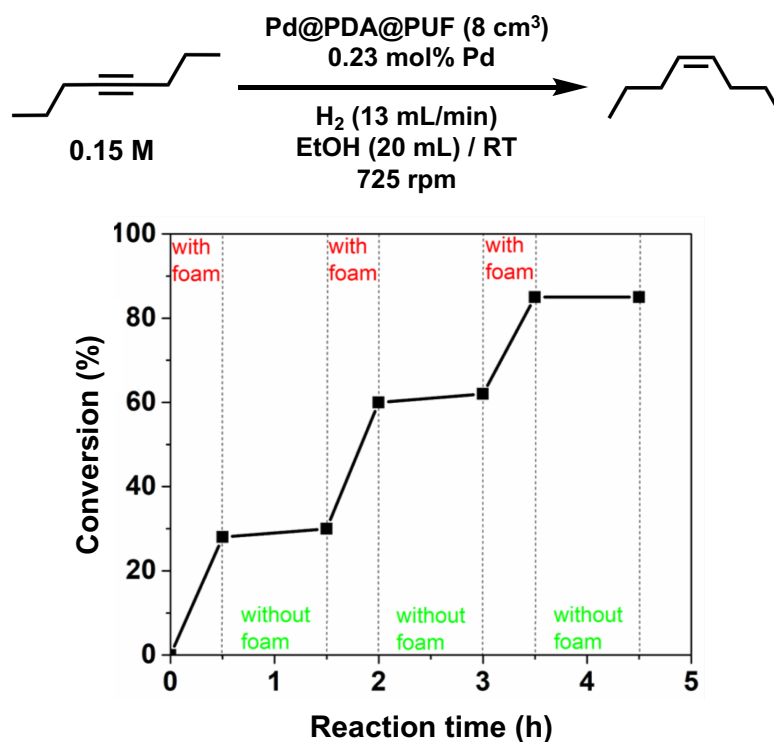

**Figure S8.** Stop-and-go experiment on 4-octyne' semi-hydrogenation with Pd@PDA@PUF. Reaction conditions: 4-octyne (3 mmol), Pd@PUF@PDA (8 cm<sup>3</sup>, Pd: 0.23 mol%), EtOH (20 mL), H<sub>2</sub> flow rate (13 mL/min), room temperature, 625 rpm.

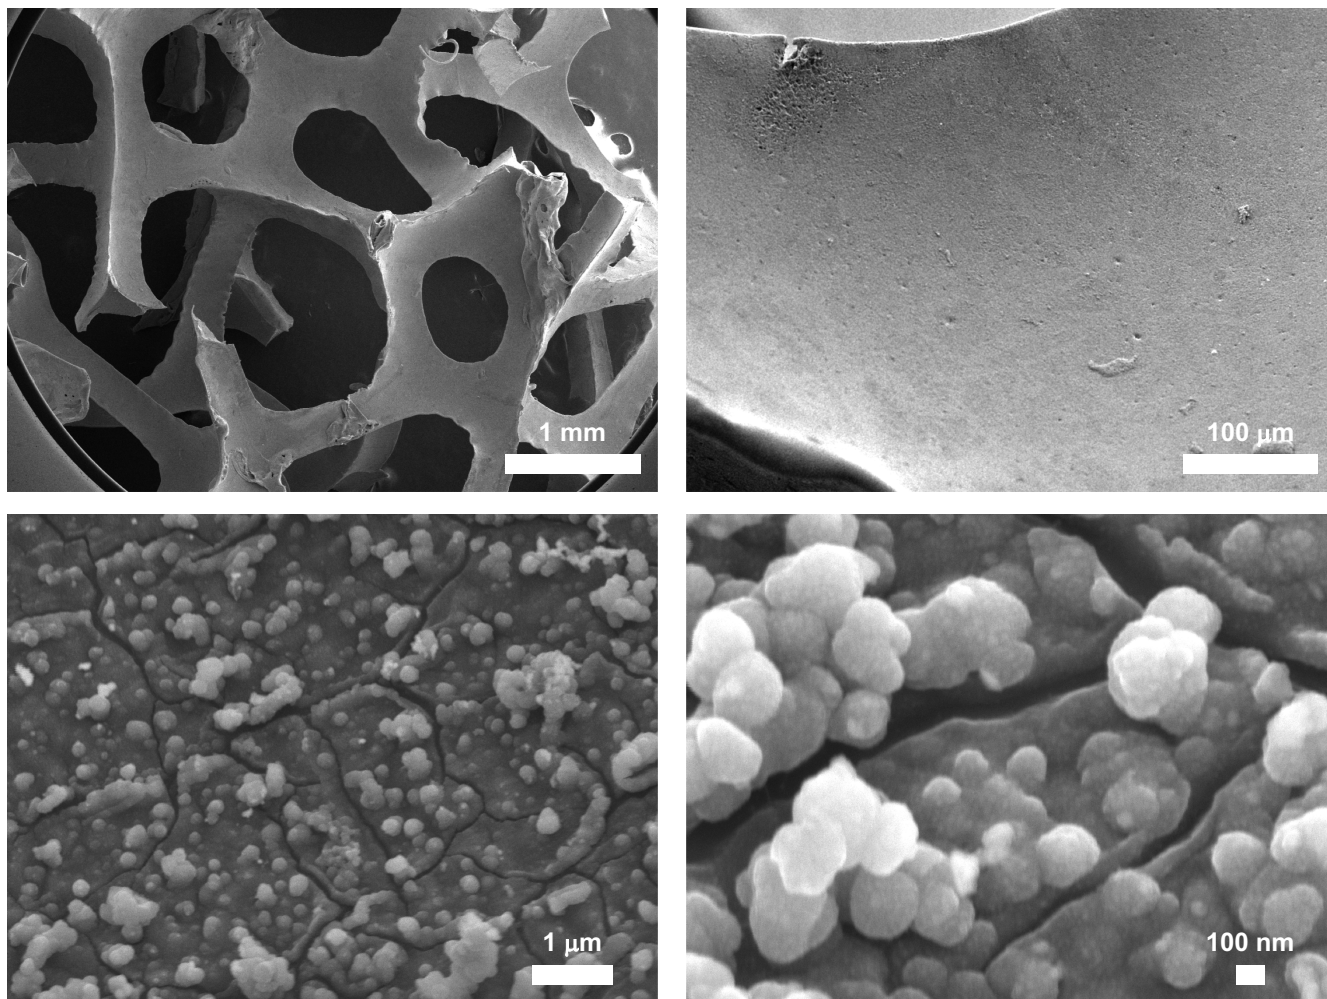

**Figure S9.** HR-SEM images with different magnifications of spent Pd@PDA@PUF (after 15 cycling tests).

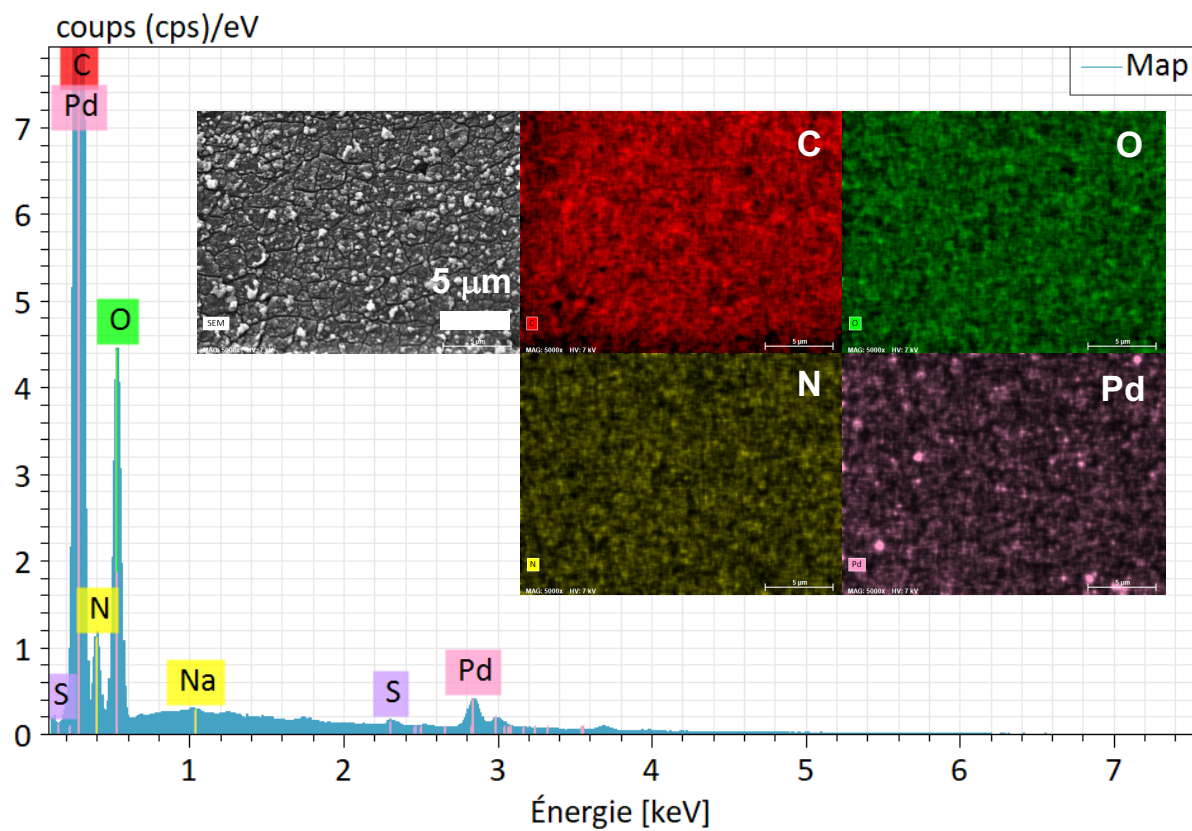

**Figure S10.** SEM-EDX spectrum and elemental maps of spent Pd@PDA@PUF (after 15 cycling tests).

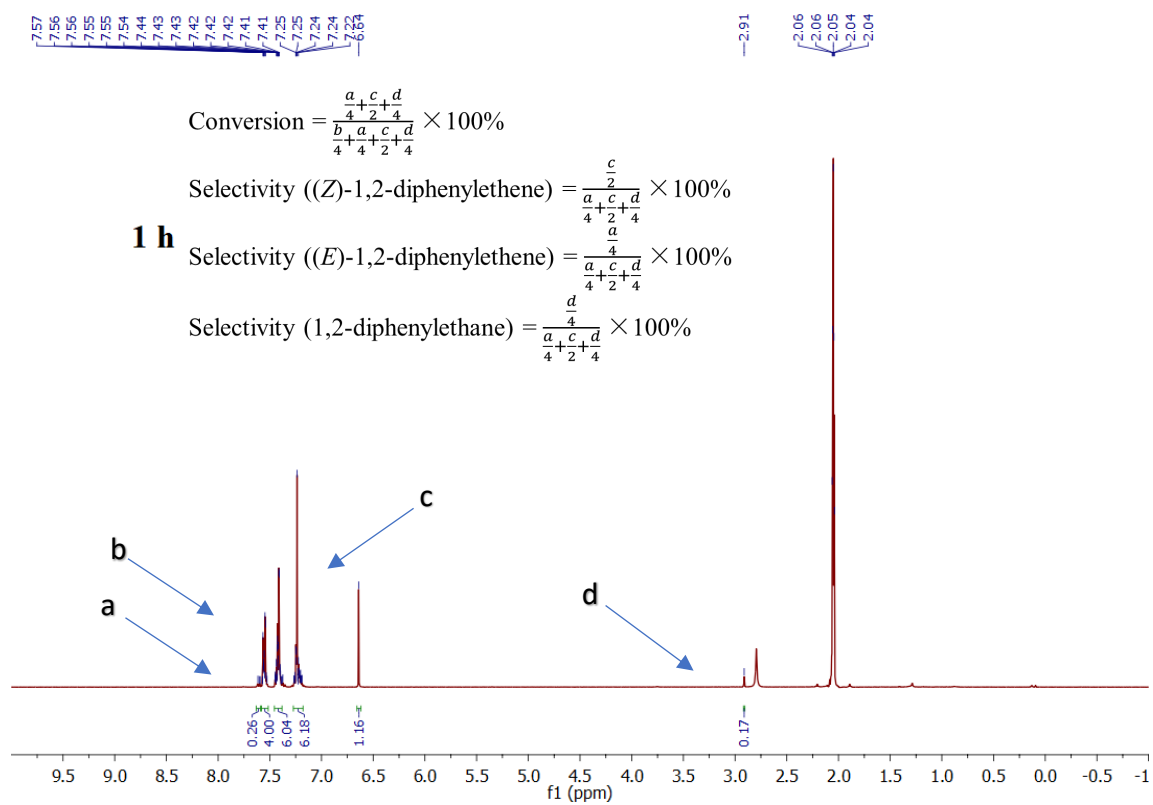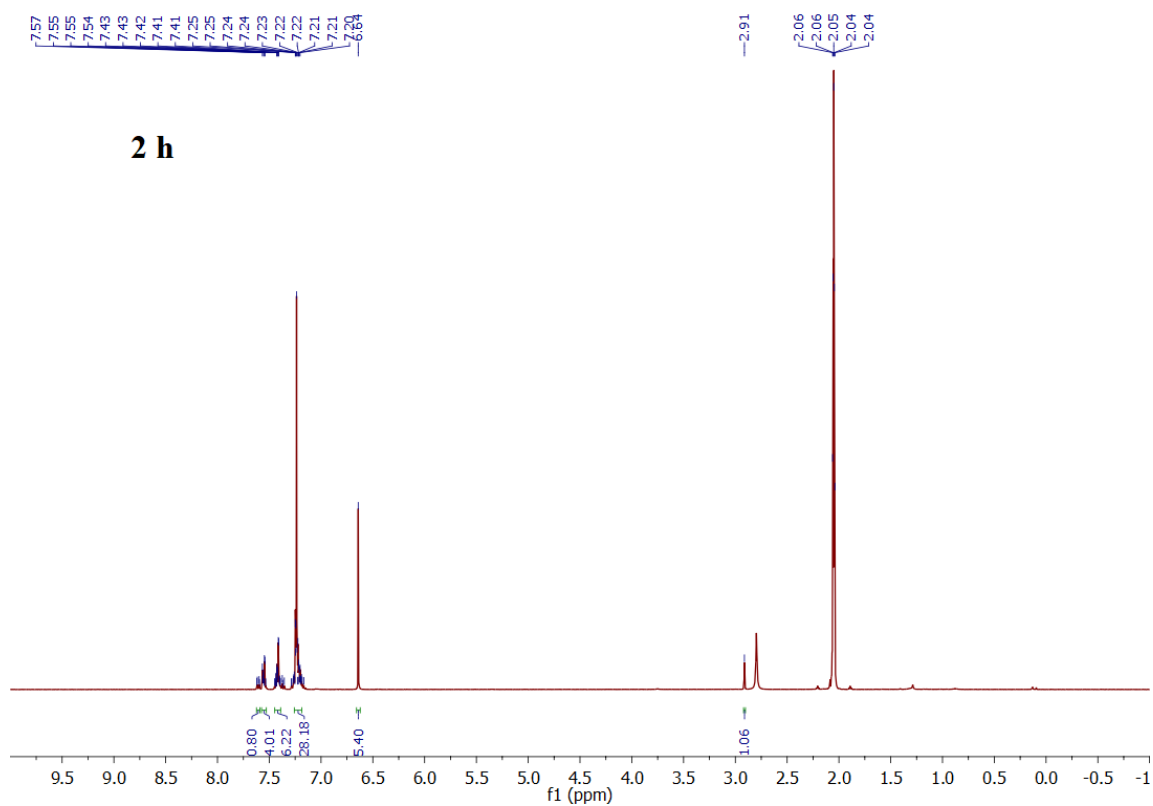



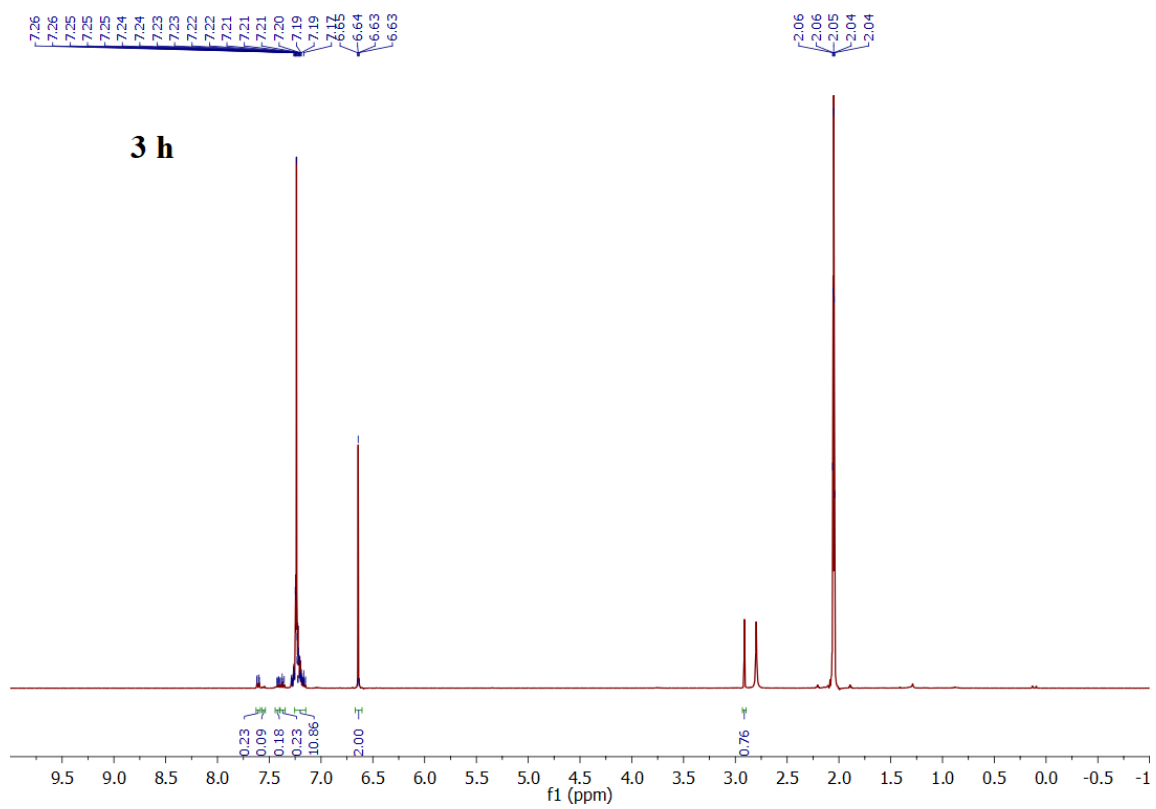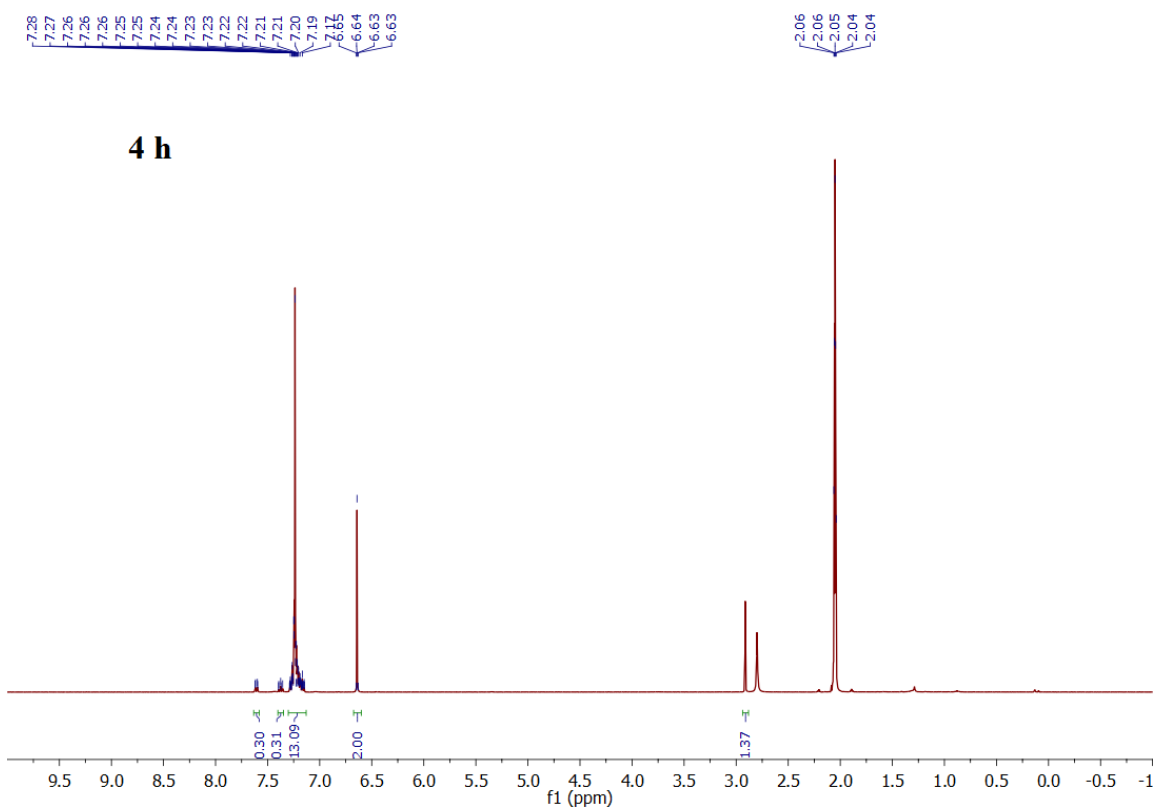

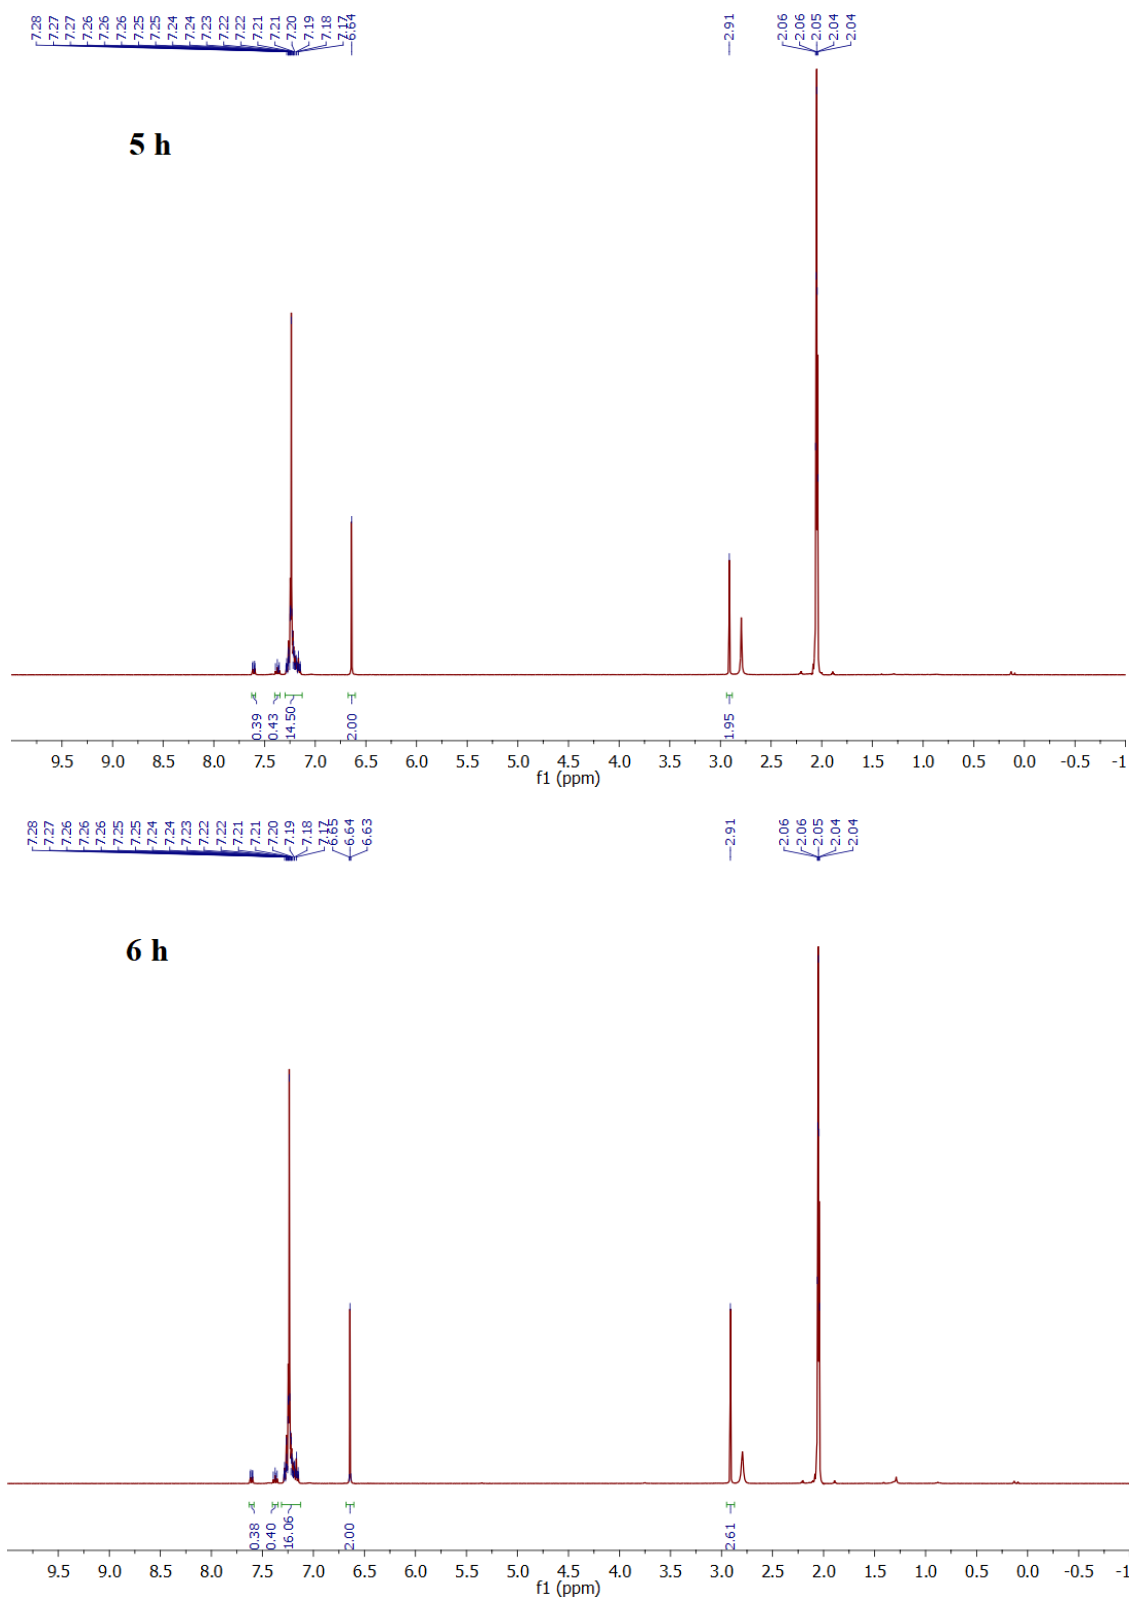

**Figure S11.**  $^1\text{H}$  NMR ( $(\text{CD}_3)_2\text{CO}$ , 400.13 MHz) spectra of the reaction mixture of the semi-hydrogenation of 1,2-diphenylethyne after 1, 2, 3, 4, 5 and 6 h reaction.

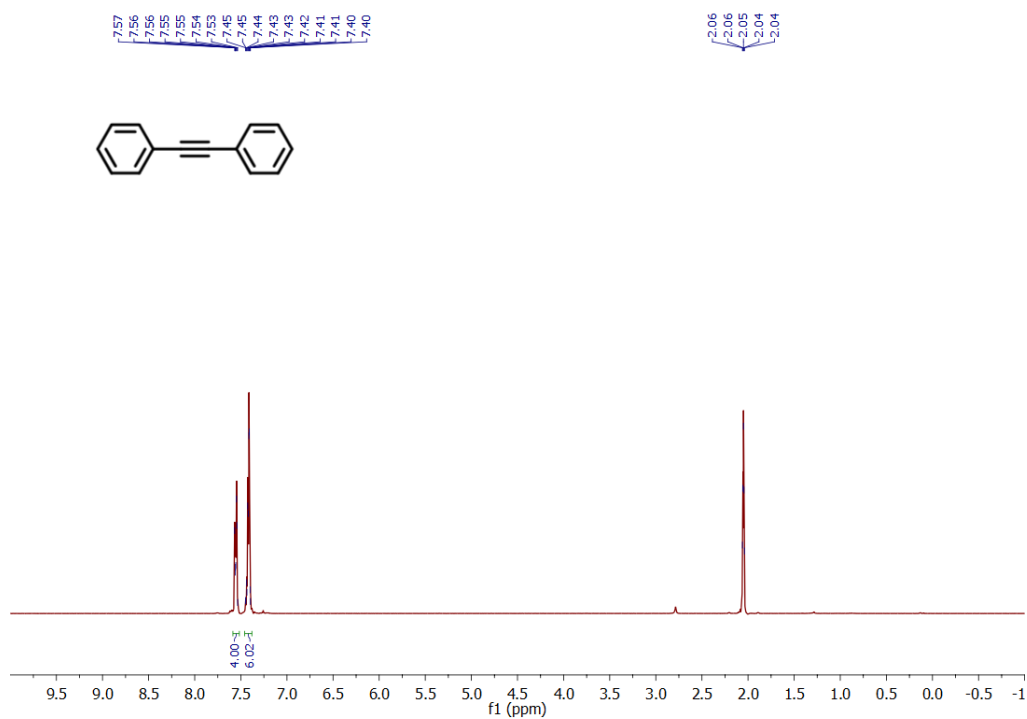

**Figure S12.** <sup>1</sup>H NMR ((CD<sub>3</sub>)<sub>2</sub>CO, 400.13 MHz) spectrum of 1,2-diphenylethyne.

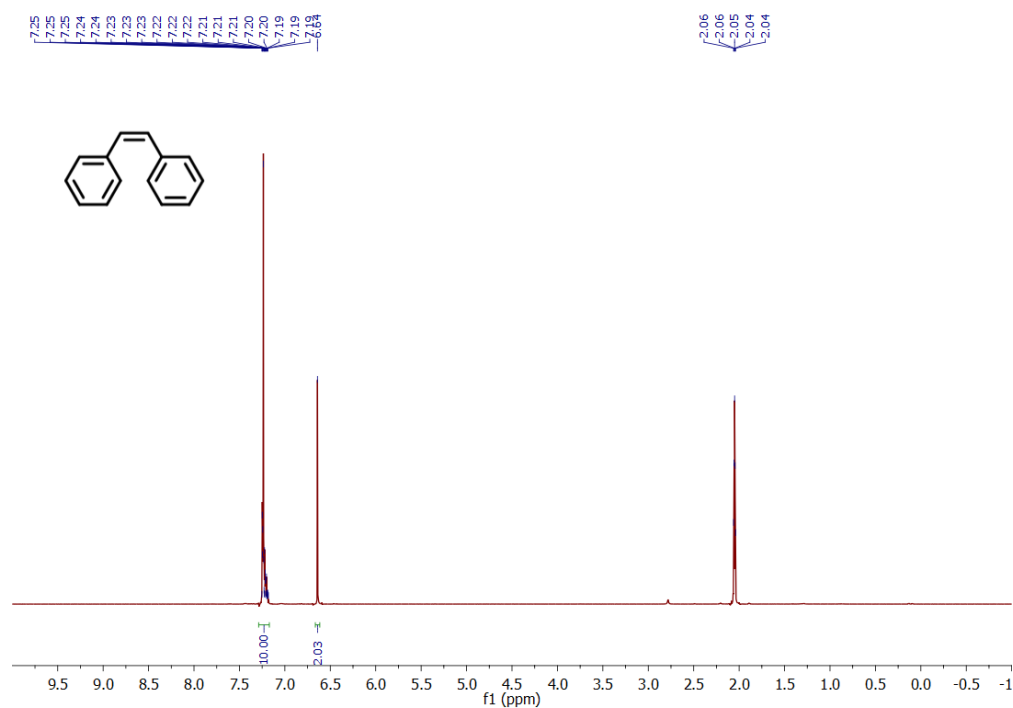

**Figure S13.** <sup>1</sup>H NMR ((CD<sub>3</sub>)<sub>2</sub>CO, 400.13 MHz) spectrum of (Z)-1,2-diphenylethene.

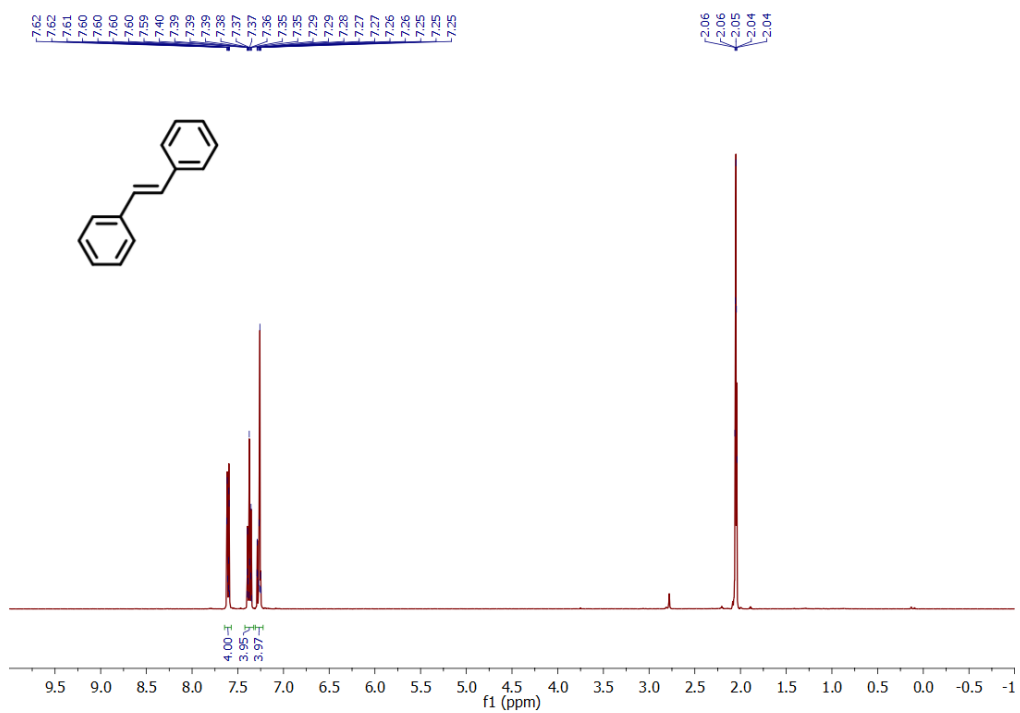



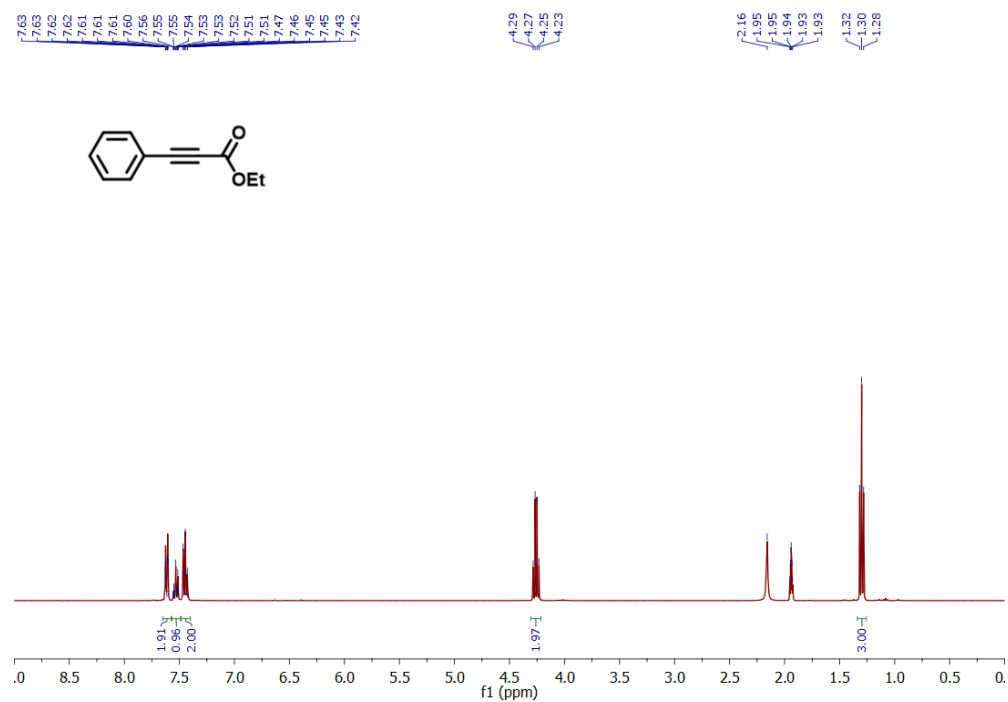

**Figure S16.** <sup>1</sup>H-NMR (CD<sub>3</sub>CN, 400.13 MHz) spectrum of ethyl 3-phenylpropiolate.

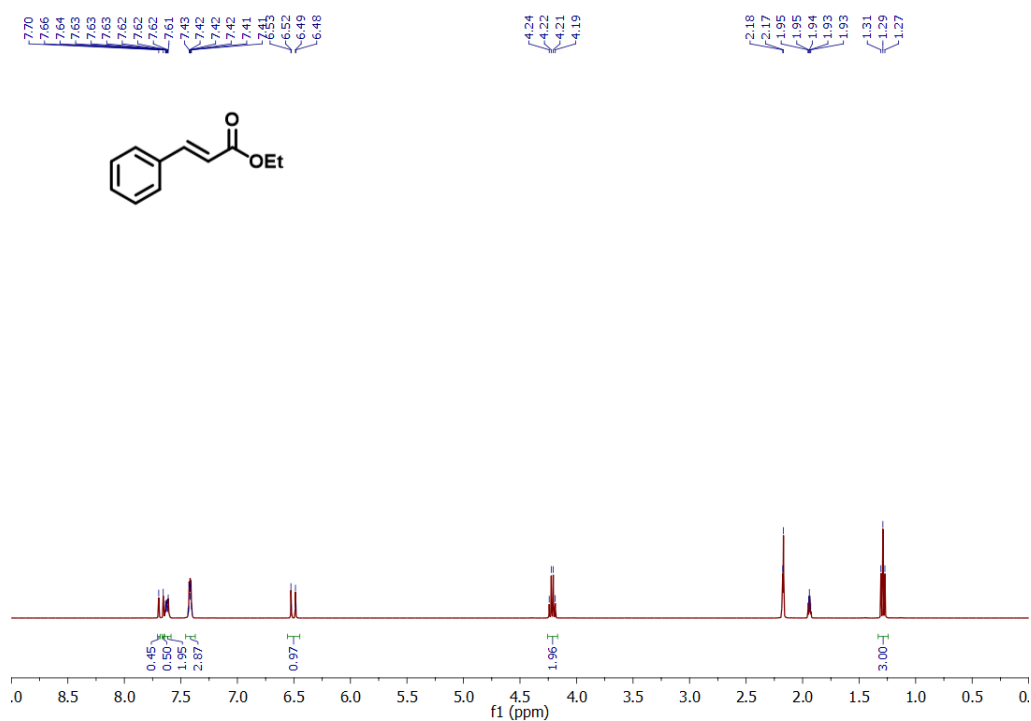

**Figure S17.** <sup>1</sup>H NMR (CD<sub>3</sub>CN, 400.13 MHz) spectrum of ethyl cinnamate.

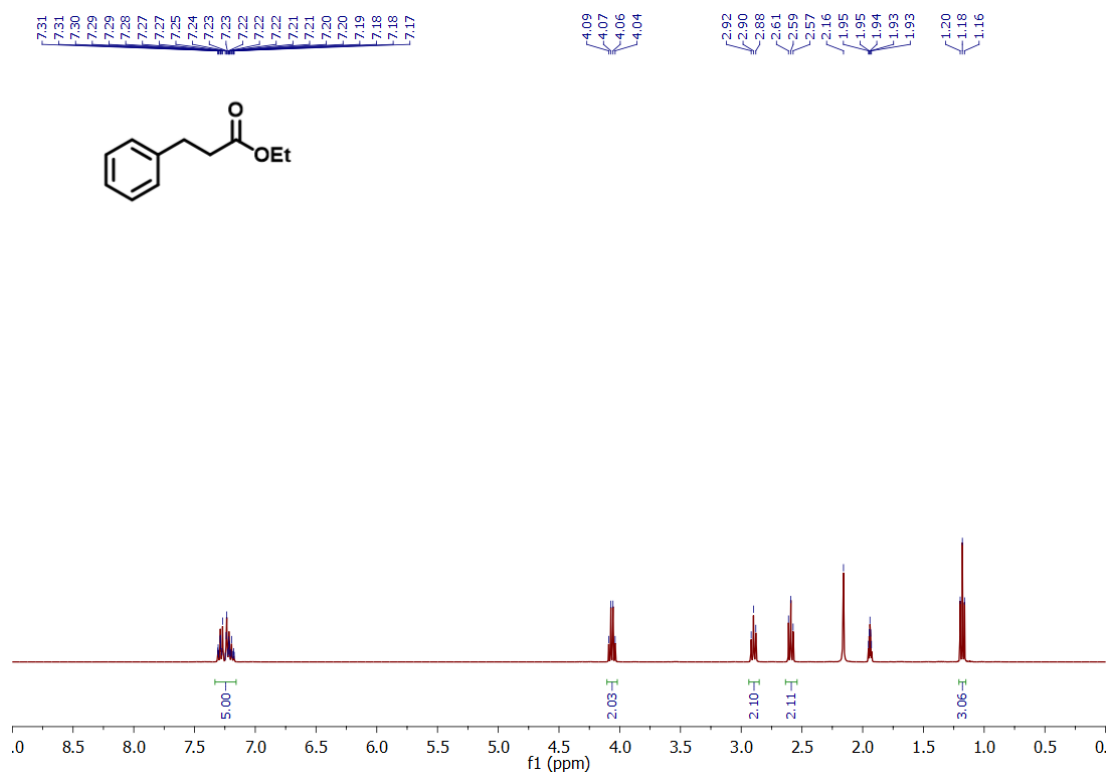

**Figure S18.** <sup>1</sup>H NMR (CD<sub>3</sub>CN, 400.13 MHz) spectrum of ethyl 3-phenylpropanoate.

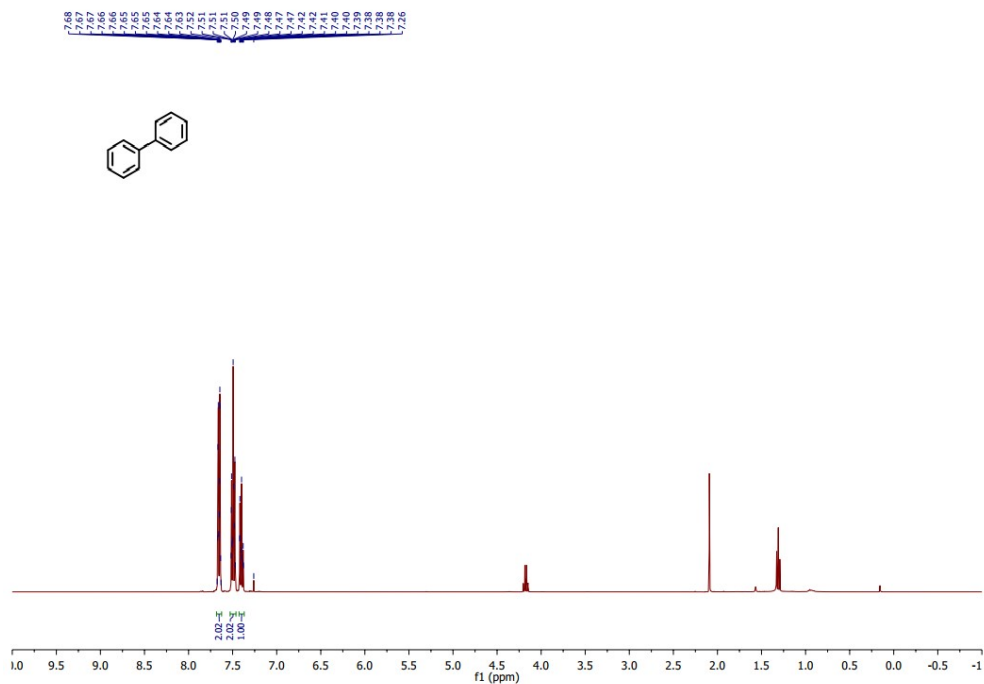

**Figure S19.** <sup>1</sup>H NMR (CDCl<sub>3</sub>) spectrum of biphenyl.

<sup>1</sup>H NMR (CDCl<sub>3</sub>, 400.13 MHz): δ 7.68–7.62 (m, 4H), 7.53–7.46 (m, 4H), 7.43 – 7.37 (m, 2H).

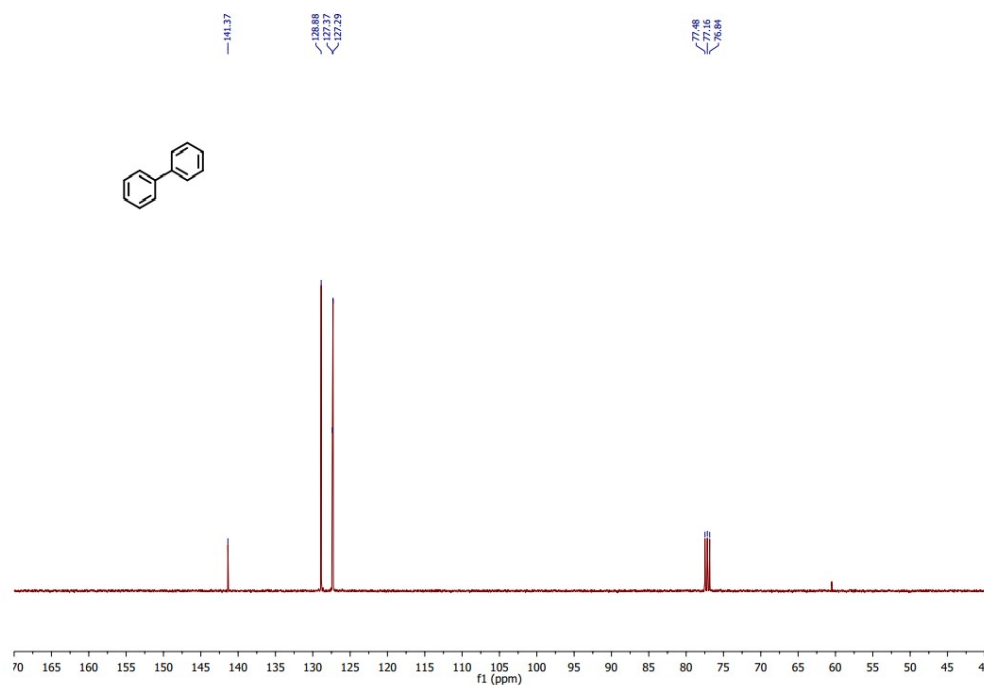

**Figure S20.** <sup>13</sup>C NMR (CDCl<sub>3</sub>) spectrum of biphenyl.

<sup>13</sup>C{<sup>1</sup>H} NMR (CDCl<sub>3</sub>, 100.61 MHz): δ 141.4, 128.9, 127.4.

<sup>1</sup>H and <sup>13</sup>C NMR data in agreement with the literature.<sup>1</sup>



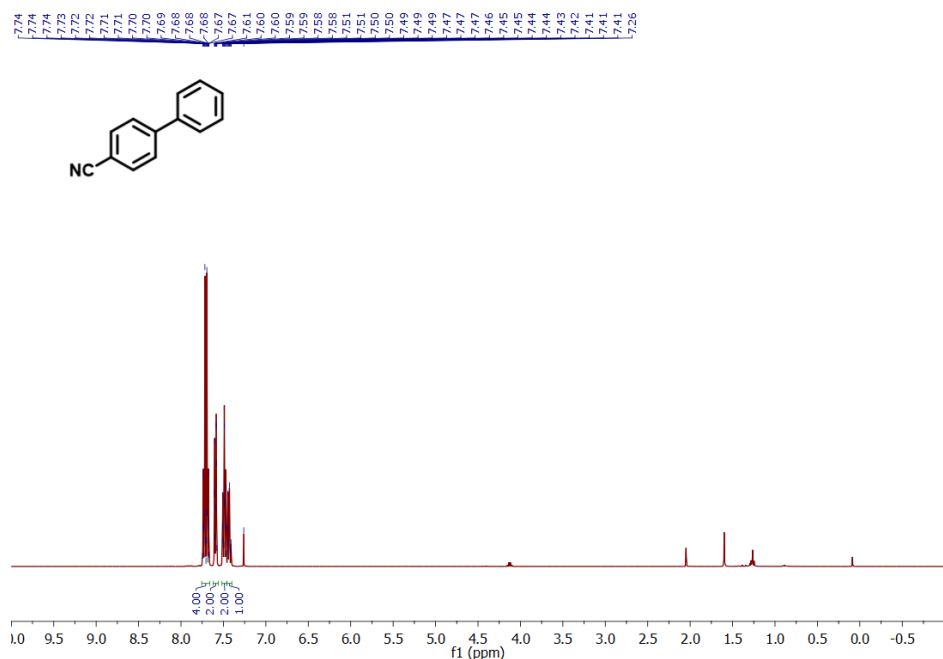

**Figure S21.**  $^1\text{H}$  NMR ( $\text{CDCl}_3$ ) spectrum of 4-cyanobiphenyl.

$^1\text{H}$  NMR ( $\text{CDCl}_3$ , 400.13 MHz):  $\delta$  7.76–7.66 (m, 4H), 7.62–7.56 (m, 2H), 7.49 (tt,  $J = 6.5, 1.1$  Hz, 2H), 7.46–7.40 (m, 1H).

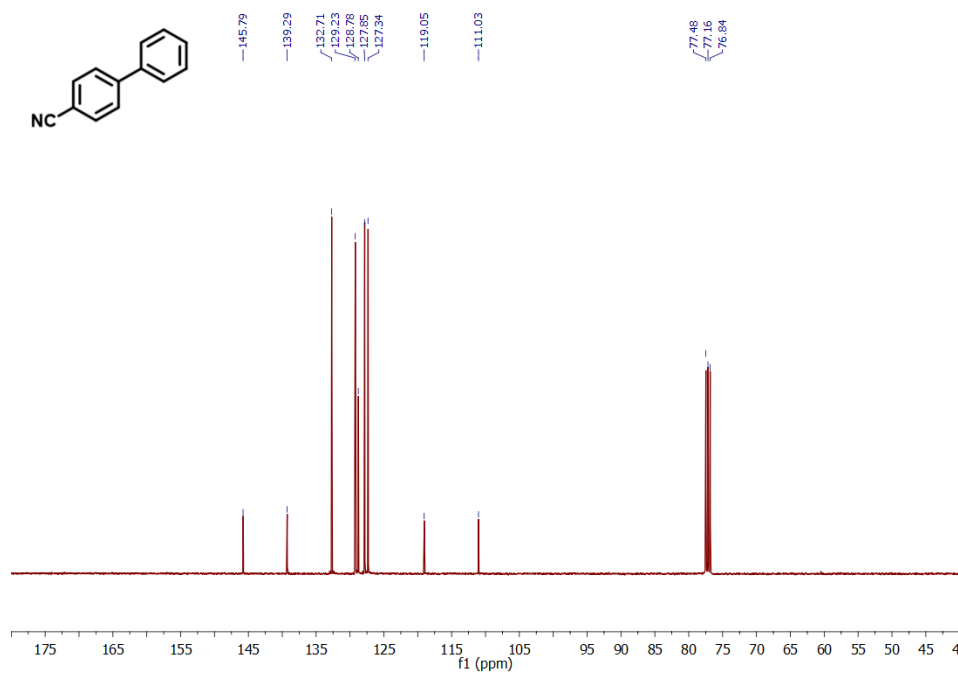

**Figure S22.**  $^{13}\text{C}$  NMR ( $\text{CDCl}_3$ ) spectrum of 4-cyanobiphenyl.

$^{13}\text{C}\{^1\text{H}\}$  NMR ( $\text{CDCl}_3$ , 100.61 MHz):  $\delta$  145.8, 139.3, 132.7, 129.2, 128.8, 127.9, 127.3, 119.1, 111.0.

$^1\text{H}$  and  $^{13}\text{C}$  NMR data in agreement with the literature.<sup>2,3</sup>

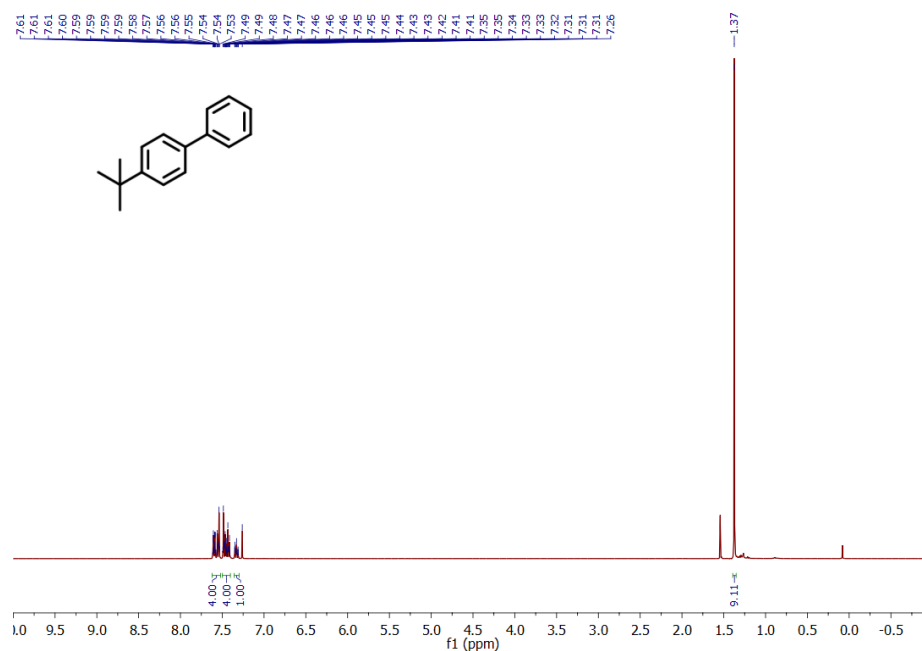

**Figure S23.** <sup>1</sup>H NMR (CDCl<sub>3</sub>) spectrum of 4-*tert*-butylbiphenyl.

<sup>1</sup>H NMR (CDCl<sub>3</sub>, 400.13 MHz): δ 7.62–7.52 (m, 4H), 7.50–7.40 (m, 4H), 7.36–7.30 (m, 1H), 1.37 (s, 9H).

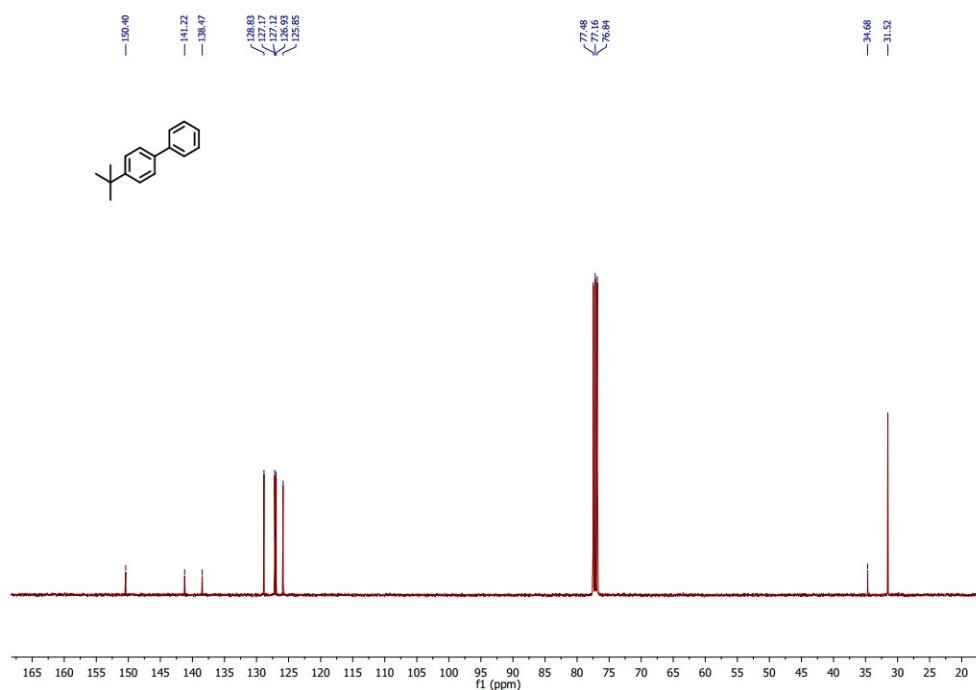

**Figure S24.** <sup>13</sup>C NMR (CDCl<sub>3</sub>) spectrum of 4-*tert*-butylbiphenyl.

<sup>13</sup>C{<sup>1</sup>H} NMR (CDCl<sub>3</sub>, 100.61 MHz): δ 150.4, 141.2, 138.5, 128.8, 127.2, 127.1, 126.9, 125.9, 34.7, 31.5.

<sup>1</sup>H and <sup>13</sup>C NMR data in agreement with the literature.<sup>2</sup>

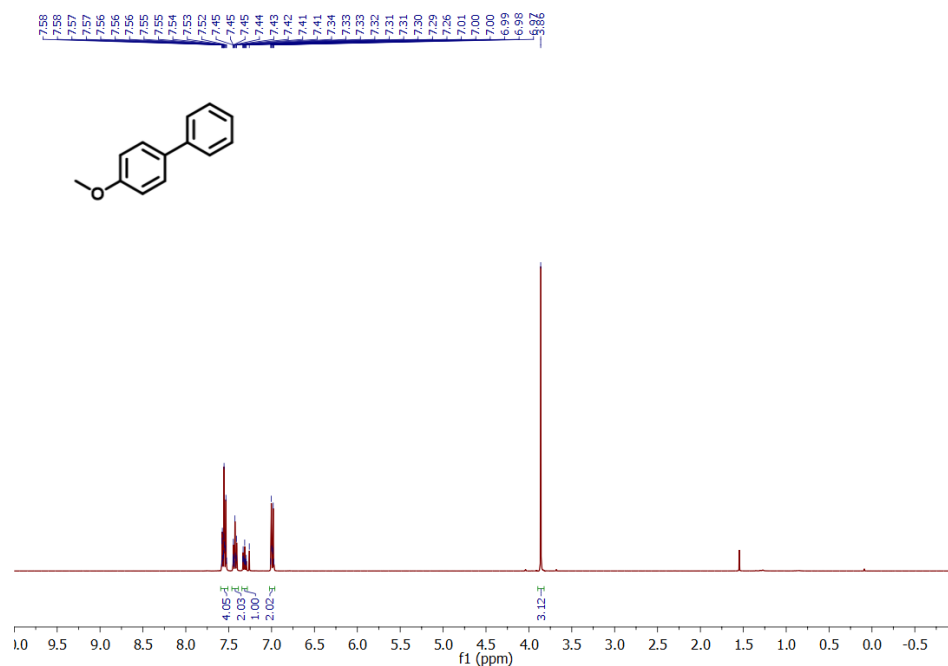

**Figure S25.** <sup>1</sup>H NMR (CDCl<sub>3</sub>) spectrum of 4-methoxybiphenyl.

<sup>1</sup>H NMR (CDCl<sub>3</sub>, 400.13 MHz): δ 7.59–7.51 (m, 4H), 7.46–7.39 (m, 2H), 7.35–7.28 (m, 1H), 7.02–6.96 (m, 2H), 3.86 (s, 3H).

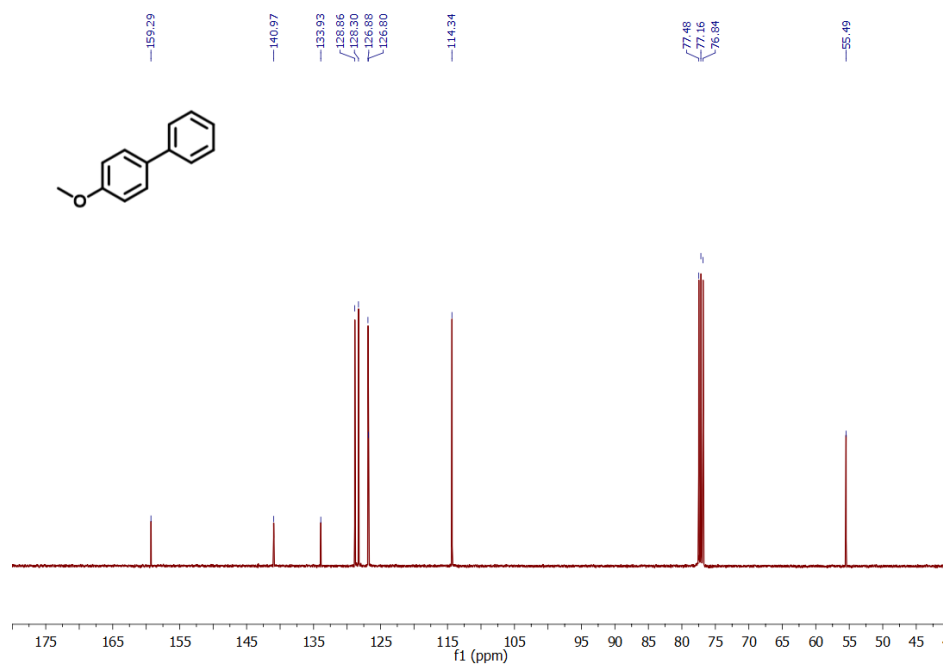

**Figure S26.** <sup>13</sup>C NMR (CDCl<sub>3</sub>) spectrum of 4-methoxybiphenyl.

<sup>13</sup>C{<sup>1</sup>H} NMR (CDCl<sub>3</sub>, 100.61 MHz): δ 159.3, 141.0, 133.9, 128.9, 128.3, 126.9, 126.8, 114.3, 55.5.

<sup>1</sup>H and <sup>13</sup>C NMR data in agreement with the literature.<sup>3,4</sup>

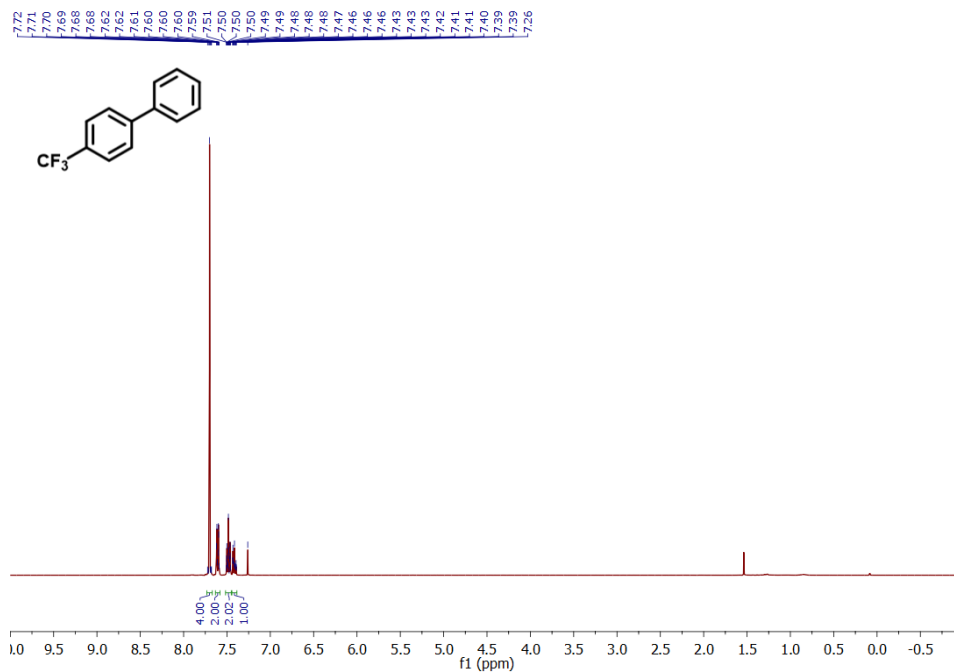

**Figure S27.** <sup>1</sup>H NMR (CDCl<sub>3</sub>) spectrum of 4-trifluoromethylbiphenyl.

<sup>1</sup>H NMR (CDCl<sub>3</sub>, 400.13 MHz): δ 7.70 (m, 4H), 7.63–7.58 (m, 2H), 7.52–7.45 (m, 2H), 7.44–7.39 (m, 1H).

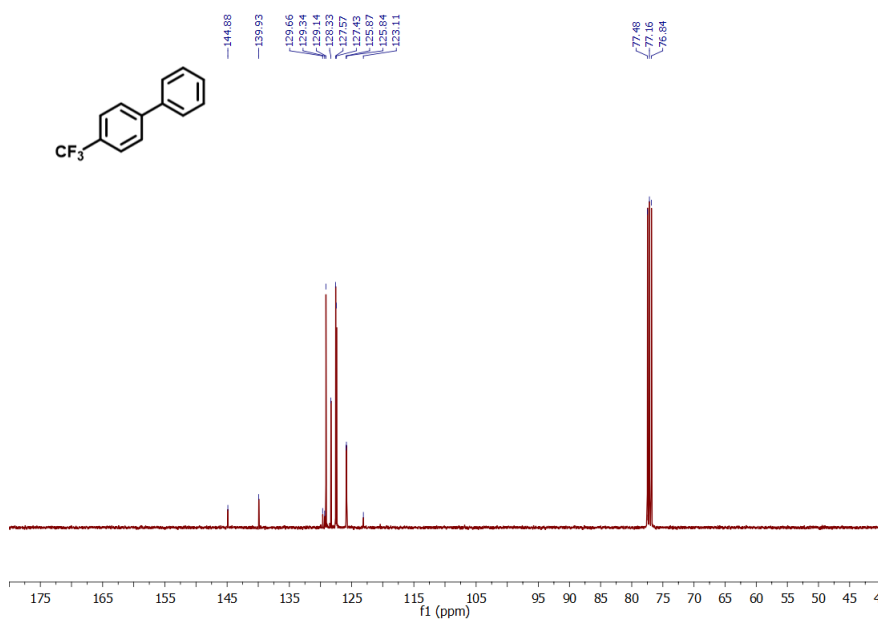

**Figure S28.** <sup>13</sup>C NMR (CDCl<sub>3</sub>) spectrum of 4-trifluoromethylbiphenyl.

<sup>13</sup>C{<sup>1</sup>H} NMR (CDCl<sub>3</sub>, 100.61 MHz): δ 144.9, 139.9, 129.4 (q, <sup>2</sup>J = 32.4 Hz), 129.1, 128.3, 127.6, 127.4, 125.9 (q, <sup>3</sup>J = 3.7 Hz), 124.5 (q, <sup>1</sup>J = 272.0 Hz).

<sup>1</sup>H and <sup>13</sup>C NMR data in agreement with the literature.<sup>5</sup>

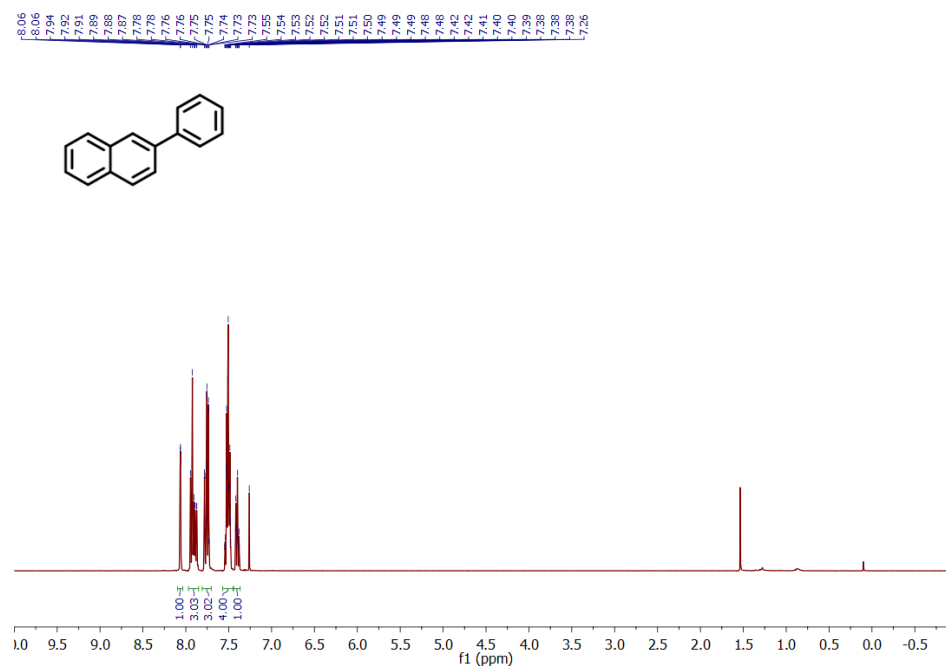

**Figure S29.** <sup>1</sup>H NMR (CDCl<sub>3</sub>) spectrum of 2-phenylnaphthalene.

<sup>1</sup>H NMR (CDCl<sub>3</sub>, 400.13 MHz):  $\delta$  8.06 (d,  $J$  = 1.8 Hz, 1H), 7.97–7.85 (m, 3H), 7.81–7.70 (m, 3H), 7.57–7.45 (m, 4H), 7.44–7.37 (m, 1H).

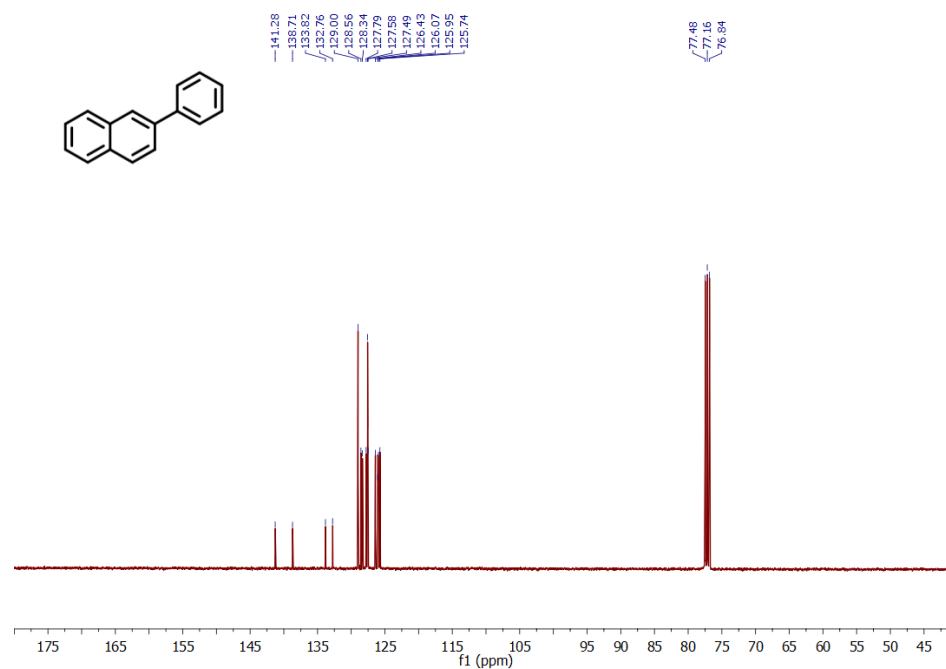

**Figure S30.** <sup>13</sup>C NMR (CDCl<sub>3</sub>) spectrum of 2-phenylnaphthalene.

<sup>13</sup>C{<sup>1</sup>H} NMR (CDCl<sub>3</sub>, 100.61 MHz):  $\delta$  141.3, 138.7, 133.8, 132.8, 129.0, 128.6, 128.3, 127.8, 127.6, 127.5, 126.4, 126.1, 126.0, 125.7.

<sup>1</sup>H and <sup>13</sup>C NMR data in agreement with the literature.<sup>3,4</sup>

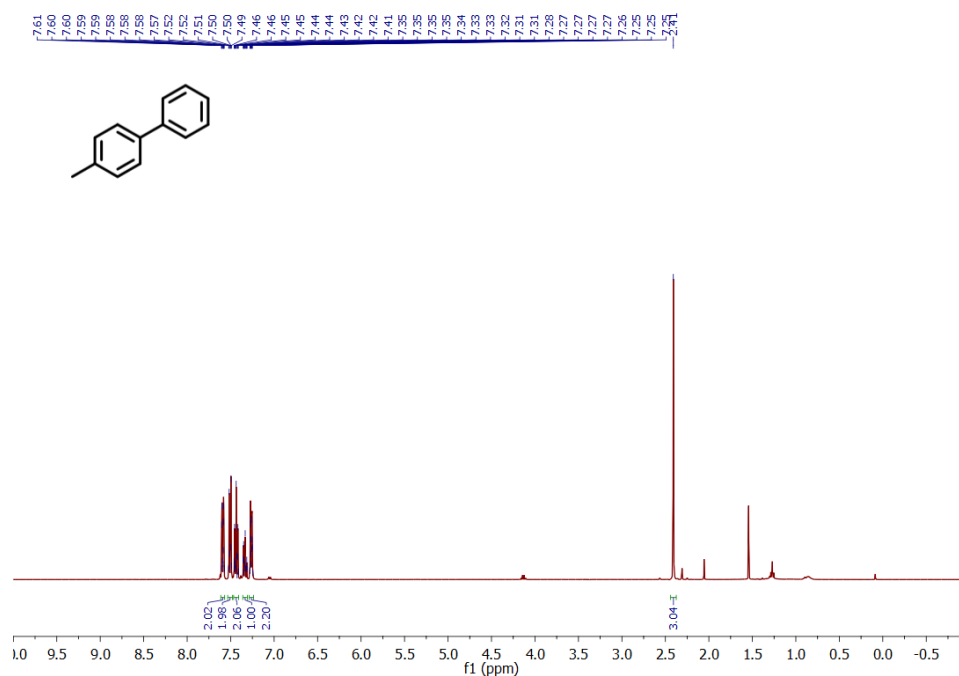

**Figure S31.** <sup>1</sup>H NMR (CDCl<sub>3</sub>) spectrum of 4-methyl-1,1'-biphenyl.

<sup>1</sup>H NMR (CDCl<sub>3</sub>, 400.13 MHz): δ 7.61–7.57 (m, 2H), 7.53–7.48 (m, 2H), 7.47–7.41 (m, 2H), 7.36–7.31 (m, 1H), 7.29–7.24 (m, 2H), 2.41 (s, 3H).

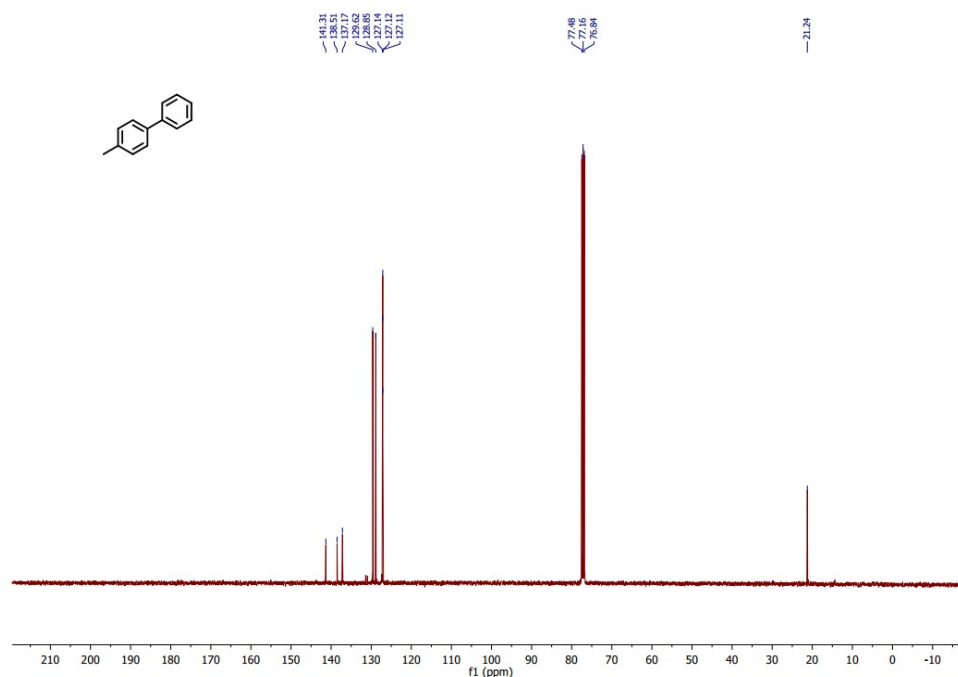

**Figure S32.** <sup>13</sup>C NMR (CDCl<sub>3</sub>) spectrum of 4-methyl-1,1'-biphenyl.

<sup>13</sup>C{<sup>1</sup>H} NMR (CDCl<sub>3</sub>, 100.61 MHz): δ 141.3, 138.5, 137.2, 129.6, 128.9, 127.1, 127.1, 127.1, 21.2.

<sup>1</sup>H and <sup>13</sup>C NMR data in agreement with the literature.<sup>3,4</sup>

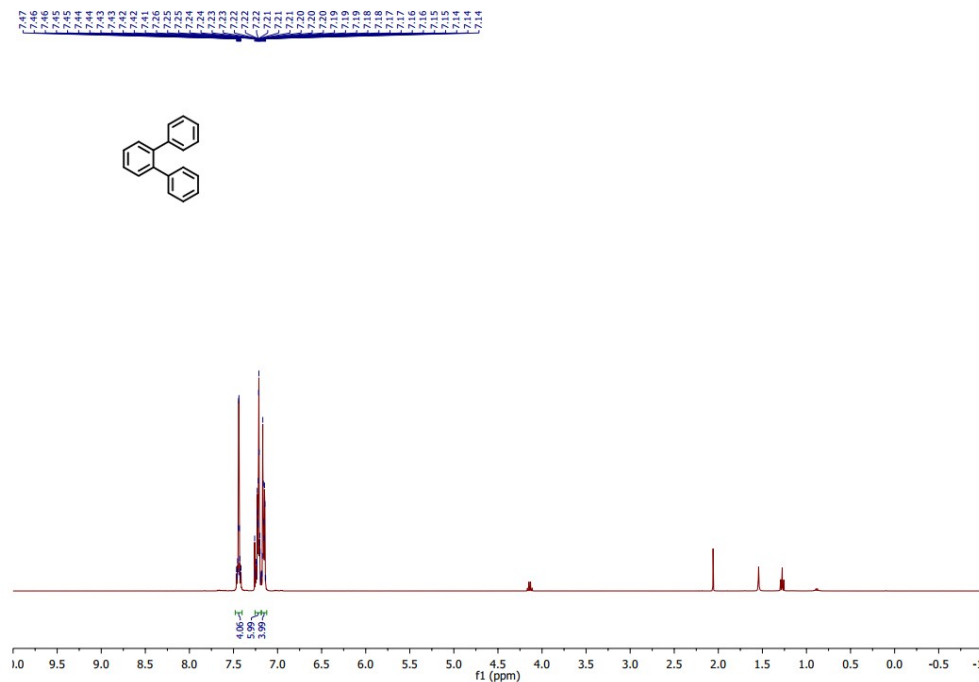

**Figure S33.**  $^1\text{H}$  NMR (CDCl<sub>3</sub>) spectrum of *o*-terphenyl.

$^1\text{H}$  NMR (CDCl<sub>3</sub>, 400.13 MHz):  $\delta$  7.47–7.41 (m, 4H), 7.26–7.18 (m, 6H), 7.18–7.12 (m, 4H).

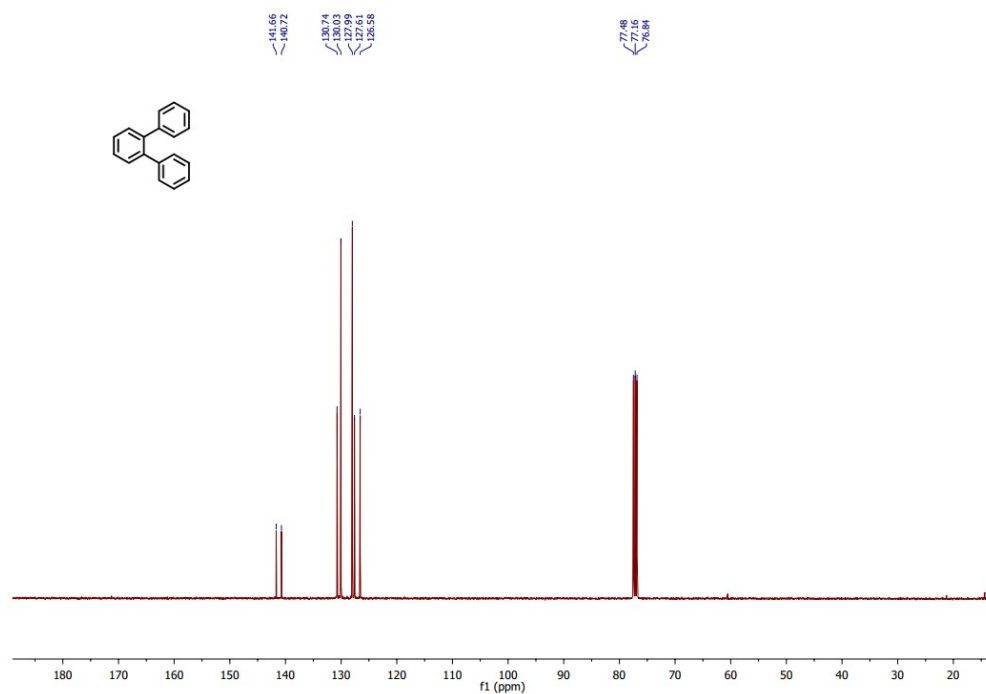

**Figure S34.**  $^{13}\text{C}$  NMR (CDCl<sub>3</sub>) spectrum of *o*-terphenyl.

$^{13}\text{C}\{^1\text{H}\}$  NMR (CDCl<sub>3</sub>, 100.61 MHz):  $\delta$  141.7, 140.7, 130.7, 130.0, 128.0, 127.6, 126.6.

$^1\text{H}$  and  $^{13}\text{C}$  NMR data in agreement with the literature.<sup>6</sup>





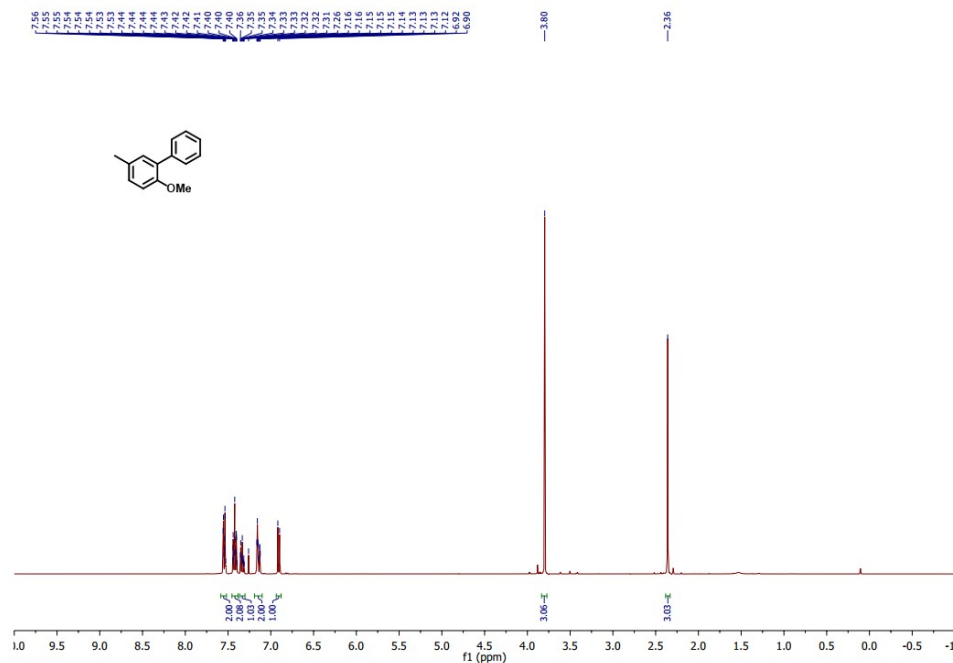

**Figure S37.** <sup>1</sup>H NMR (CDCl<sub>3</sub>) spectrum of 2-methoxy-5-methyl-1,1'-biphenyl.

<sup>1</sup>H NMR (CDCl<sub>3</sub>, 400.13 MHz): δ 7.58–7.52 (m, 2H), 7.45–7.38 (m, 2H), 7.37–7.30 (m, 1H), 7.19–7.10 (m, 2H), 6.91 (d, *J* = 8.2 Hz, 1H), 3.80 (s, 3H), 2.36 (s, 3H).

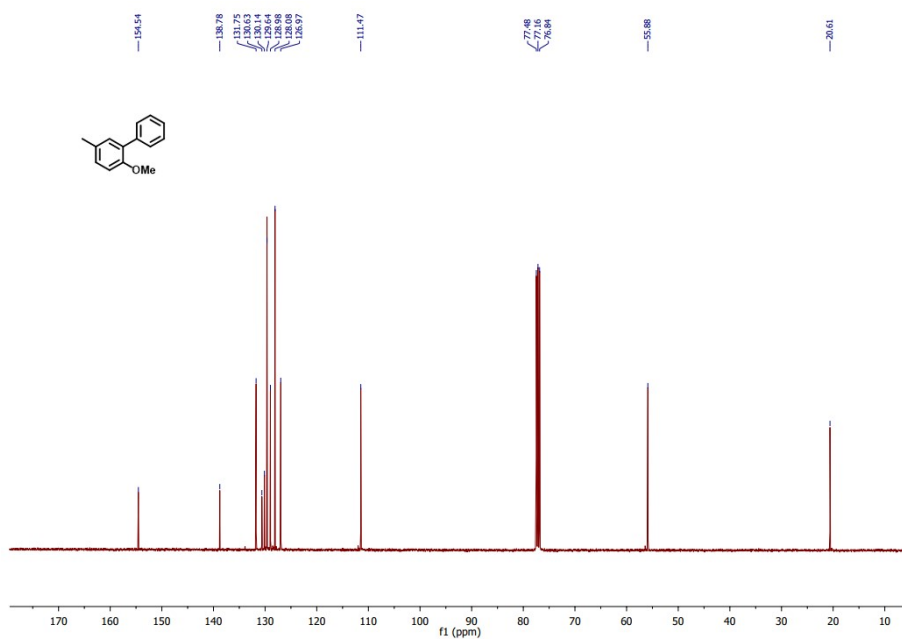

**Figure S38.** <sup>13</sup>C NMR (CDCl<sub>3</sub>) spectrum of 2-methoxy-5-methyl-1,1'-biphenyl.

<sup>13</sup>C{<sup>1</sup>H} NMR (CDCl<sub>3</sub>, 100.61 MHz): δ 154.5, 138.8, 131.8, 130.6, 130.1, 129.6, 129.0, 128.1, 127.0, 111.5, 55.9, 20.6.

<sup>1</sup>H and <sup>13</sup>C NMR data in agreement with the literature.<sup>8</sup>

---

## References

1. H. Zeng, D. Cao, Z. Qiu and C.-J. Li, *Angew. Chem. Int. Ed.*, 2018, **57**, 3752–3757.
2. J. P. Wolfe, R. A. Singer, B. H. Yang and S. L. Buchwald, *J. Am. Chem. Soc.*, 1999, **121**, 9550–9561.
3. W. Liu, H. Cao, H. Zhang, H. Zhang, K. H. Chung, C. He, H. Wang, F. Y. Kwong and A. Lei, *J. Am. Chem. Soc.*, 2010, **132**, 16737–16740.
4. S.-Y. Ding, J. Gao, Q. Wang, Y. Zhang, W.-G. Song, C.-Y. Su and W. Wang, *J. Am. Chem. Soc.*, 2011, **133**, 19816–19822.
5. E. J. Cho, T. D. Senecal, T. Kinzel, Y. Zhang, D. A. Watson and S. L. Buchwald, *Science*, 2010, **328**, 1679–1681.
6. G. Liu, F. Han, C. Liu, H. Wu, Y. Zeng, R. Zhu, X. Yu, S. Rao, G. Huang, J. Wang, *Organometallics*, 2019, **38**, 1459–1467.
7. S. Santra, P. K. Hota, R. Bhattacharyya, P. Bera, P. Ghosh, S. K. Mandal, *ACS Catal.*, 2013, **3**, 2776–2789.
8. X. Xiong, R. Zhu, L. Huang, S. Chang, J. Huang, *Synlett*, 2017, **28**, 2046–2050.
